# Supplementary material for: What are the important design features of personal health records to improve medication adherence for patients with long-term conditions? A systematic literature review
Source: PubMed Central journal article supplement — BMJ Open. 2019 Sep 26;9(9):e028628. doi: 10.1136/bmjopen-2018-028628 (PMC6773318; doi:10.1136/bmjopen-2018-028628), 2019-09-26
Supplement: bmjopen-2018-028628.draft_revisions.pdf [file bmjopen-2018-028628.draft_revisions.pdf]

# BMJ Open

BMJ Open is committed to open peer review. As part of this commitment we make the peer review history of every article we publish publicly available.

When an article is published we post the peer reviewers' comments and the authors' responses online. We also post the versions of the paper that were used during peer review. These are the versions that the peer review comments apply to.

The versions of the paper that follow are the versions that were submitted during the peer review process. They are not the versions of record or the final published versions. They should not be cited or distributed as the published version of this manuscript.

BMJ Open is an open access journal and the full, final, typeset and author-corrected version of record of the manuscript is available on our site with no access controls, subscription charges or pay-per-view fees (<http://bmjopen.bmj.com>).

If you have any questions on BMJ Open's open peer review process please email [info.bmjopen@bmj.com](mailto:info.bmjopen@bmj.com)

# BMJ Open

**What are the important design features of personal health records to improve medication adherence for patients with long term conditions? A systematic literature review.**

|                               |                                                                                                                                                                                                                                                                                                                                                                                      |
|-------------------------------|--------------------------------------------------------------------------------------------------------------------------------------------------------------------------------------------------------------------------------------------------------------------------------------------------------------------------------------------------------------------------------------|
| Journal:                      | <i>BMJ Open</i>                                                                                                                                                                                                                                                                                                                                                                      |
| Manuscript ID                 | bmjopen-2018-028628                                                                                                                                                                                                                                                                                                                                                                  |
| Article Type:                 | Research                                                                                                                                                                                                                                                                                                                                                                             |
| Date Submitted by the Author: | 17-Dec-2018                                                                                                                                                                                                                                                                                                                                                                          |
| Complete List of Authors:     | Andrikopoulou, Elisavet; University of Portsmouth Faculty of Technology, School of Computing;<br>Scott, Philip; University of Portsmouth Faculty of Technology, School of Computing<br>Herrera, Helena; University of Portsmouth, Faculty of Science, School of Pharmacy and biomedical sciences<br>Good, Alice; University of Portsmouth Faculty of Technology, School of Computing |
| Keywords:                     | personal health record, medication adherence, medical informatics, systematic literature review, long-term conditions, PHR                                                                                                                                                                                                                                                           |
|                               |                                                                                                                                                                                                                                                                                                                                                                                      |

SCHOLARONE™  
Manuscripts

# What are the important design features of personal health records to improve medication adherence for patients with long term conditions? A systematic literature review.

Corresponding author:

Elisavet Andrikopoulou, MRes, BSc

+44 (0) 23 9284 6378

PhD Candidate

School of Computing, Faculty of Technology, University of Portsmouth

Buckingham Building, Lion Terrace, Portsmouth PO1 3HE

[elisavet.andrikopoulou@port.ac.uk](mailto:elisavet.andrikopoulou@port.ac.uk)

Dr Philip Scott

Senior Lecturer, School of Computing, Faculty of Technology, University of Portsmouth

[philip.scott@port.ac.uk](mailto:philip.scott@port.ac.uk)

Dr Helena Herrera

Senior Lecturer, School of Pharmacy and Biomedical Sciences, Faculty of Science, University of Portsmouth

[helena.herrera@port.ac.uk](mailto:helena.herrera@port.ac.uk)

Dr Alice Good

Senior Lecturer, School of Computing, Faculty of Technology, University of Portsmouth

[alice.good@port.ac.uk](mailto:alice.good@port.ac.uk)

Word Count: 3109

Literature review

## KEYWORDS

Personal health record, medication adherence, medical informatics, systematic literature review, long-term conditions

## ABSTRACT

**Objectives:** This systematic literature review aims to identify important design features of the electronic personal health record (PHR) that may improve medication adherence in the adult population with long-term conditions and whether implementation factors or demographics interact with the PHR impact.

**Data sources:** PubMed (including MEDLINE), CINAHL, Science Direct (including EMBASE), BioMed Central, ACM digital, Emerald Insight, Google Scholar and Research Gate.

**Methods:** Studies published in the last fifteen years, in English, were included if the participants were adults, with at least one long-term condition, able to self-administer their medication and were treated in primary care settings. The quality of evidence was assessed with the Grading of Recommendations Assessment, Development, and Evaluation (GRADE) system and the risk of bias was appraised using the Cochrane RevMan tool.

**Results:** From a total of 35 studies that matched the inclusion criteria, 12 were excluded due to low quality of evidence, 13 rated moderate and 10 high quality. All the included studies had low sample size and limited follow-up duration. The most frequently identified conditions were HIV and diabetes. The most common measure of medication adherence was the Morisky Medication Adherence Scale. This review did not identify any papers with negative results. It was not possible to numerically aggregate the PHR effect due to high heterogeneity of the medication adherence measurement, study type, participants and PHRs used. This review identified 12 PHR design features that seem to have an impact on medication adherence, but it was impossible to draw conclusions as to which feature is important to what group of patients and why.

**Conclusion:** Although we found recurrent evidence that PHRs can improve medication adherence, there is little evidence to date to indicate which design features facilitate this process.

**Registration:** PROSPERO CRD42017060542

## ARTICLE SUMMARY

### Strengths and limitations of this study

- This is a systematic literature review that follows the Preferred Reporting Items for Systematic Reviews and Meta-Analyses (PRISMA) guidelines;
- The protocol was published before conducting the study to avoid data-driven decisions; no deviations from the protocol have been made;
- A comprehensive literature search was carried out using eight major research paper databases, hand-searching and snowballing;
- All included studies were quality assessed using well-cited tools and documentation;
- A study limitation is that only studies published in English language were included

Literature review

## INTRODUCTION

NHS policy anticipates that increasing usage of health apps by patients will reduce demand on healthcare services. Current NHS policy documents and frameworks such as *Personalised Health and Care 2020* (PHC2020) [1] and the *Five Year Forward View* [2] advocate that information and communication technology (ICT) can reduce healthcare costs, improve healthcare outcomes and this can be achieved by 2020. This assertion, however, is not based upon scientific research, so the claimed benefits remain aspirational.

Currently, 74% of UK nationals older than 45 years old and almost all younger adults are using the internet almost every day.[3] Based on the results of a 2017 US survey, roughly 40% of chronically ill patients were interested in using technology to assist them with medication, diagnosis, test results and managing their condition in their home environment.[4]

A form of ICT that could potentially benefit the patients and the healthcare services is the electronic personal health records (PHR). A PHR has been defined as: “online systems that include collections of patients’ healthcare and medical data, which utilise health informatics standards to enable patients to share, organize and manage these data according to their own views”.[5] Some of the indicated benefits of PHRs are the ability of PHR to improve patient outcomes, decrease care cost, allow patients the ability to self-manage their health, increase access to care especially in remote areas, empower patients and improve medication adherence.[6,7]

Medication adherence is a well-known challenge in healthcare,[8,9] but there is limited evidence whether PHRs actually improve medication adherence in chronically ill adults and no evidence synthesis as to which PHR design features are the most effective. Medication adherence can be defined as “the extent to which a person’s behaviour towards their medication intake, corresponds with agreed recommendations from a health care provider”.[9] Based on the ABC taxonomy [10] for medication adherence, there are three components to medication adherence: initiation (the time until the first dose has been taken), implementation (the extend to whether a patient’s dosage consumption correspond to the prescribed dose regimen) and discontinuation (stop taking the medication).[10]

This is the first systematic literature review that aims to identify important design features of the PHR that may improve medication adherence in the adult population with long-term conditions.

### Objectives

#### Primary objective

Identify the important design features of the PHR that may improve medication adherence in the adult population with long-term conditions.

#### Secondary objectives

- Identify the PHR design features that improve medication adherence in the cases of:
  - polypharmacy;
  - specific long term condition groups;
- Identify if there is a correlation between participants’ demographic characteristics, their usage of PHRs and their medication adherence;
- Explore how implementation factors affects medication adherence.

Literature review

## METHODS

This systematic review is registered in the prospective register of systematic reviews (PROSPERO), registration number CRD42017060542 and follows the Preferred Reporting Items for Systematic Reviews and Meta-Analyses (PRISMA) guidelines.[11] The PRISMA checklist is provided as an additional file. The protocol for this study is published.[5]

### Study eligibility and selection

This review's inclusion and exclusion criteria are illustrated in Table 1 and are detailed in the published protocol.[5] There have been no deviations from the protocol.

Table 1 Summary of the PICOS elements included and excluded in the systematic review

|                   | Inclusion criteria                                                                                                                                                                                                                                   | Exclusion criteria                                                                                                                                                                                                                                                                                                                            |
|-------------------|------------------------------------------------------------------------------------------------------------------------------------------------------------------------------------------------------------------------------------------------------|-----------------------------------------------------------------------------------------------------------------------------------------------------------------------------------------------------------------------------------------------------------------------------------------------------------------------------------------------|
| Participants      | Humans<br>Adults with at least one long term condition<br>Patients that can self-administer their medication<br>Patients that are able to communicate freely and able to self-manage their medication.<br>Patients treated outside the hospital only | Animals<br>Pregnant, cancer or terminally ill patients<br>Adults with medically serious problems that are not classified as long term conditions<br>Patients that require assistance with taking their medication<br>Patients unable to communicate or unable to self-manage their medication.<br>Inpatients or patients living in care homes |
| Intervention      | Interventions of any type, intensity and frequency, that aim to investigate the effect of electronic PHRs in medication adherence, concordance, compliance or persistence.                                                                           | N/A                                                                                                                                                                                                                                                                                                                                           |
| Comparators       | Non-PHR                                                                                                                                                                                                                                              | No comparison has been made with no-PHR or with usual care                                                                                                                                                                                                                                                                                    |
| Outcome           | Any outcome related to the effect of electronic PHRs in medication adherence, concordance, compliance or persistence.                                                                                                                                | N/A                                                                                                                                                                                                                                                                                                                                           |
| Study design/type | Studies or literature reviews published in the last fifteen years, without any geographical restriction.                                                                                                                                             | Abstract-only reports without any references, commercial studies, party political statements, general discussion papers, magazine or newspaper articles, withdrawn abstracts or articles, protocols of reviews.                                                                                                                               |

Literature review

## Literature search

Mendeley software was used as the bibliographic software. One author (EA) scanned the titles and abstracts and excluded studies that clearly did not meet the inclusion criteria. Full-text versions of the remaining articles were obtained and screened by the same author, using the criteria listed on Table 1. All the excluded studies were listed with at least one reason for exclusion. In case of uncertainty, the author PS was advised and there was a discussion until an agreement was made. The reference lists of the included studies were examined to identify additional relevant literature. A hand-search of JMIR Medical Informatics, BMC Medical Informatics and Decision Making and BMJ Open was conducted by EA to identify further literature, as they were the three high impact factor, most cited journals in the search we have done that far.

## Data extraction and analysis

EA extracted the data in the predefined data extraction forms.[5] The narrative analysis of the generated data was performed by EA author and validated by PS.[5]

## Quality assessment

The quality of all included studies was assessed by the first author (EA) and 25% of the included studies were assessed by the second author (PS). The Joanna Briggs Institute (JBI) critical appraisal questionnaires were used to implement the GRADE approach [12] of quality assessment of the included studies. The GRADE approach is proposed by the Cochrane Collaboration and it favours the JBI critical appraisal tools.[13]

The final quality scores per paper (Table 2) were assigned based upon five factors: risk of bias,[14] inconsistency,[15] indirectness,[16] imprecision [17] and publication bias.[18] All the studies were graded based on their study type, for example RCTs and systematic literature reviews started as high quality studies. Using the GRADE categories we started from the highest possible score based on the study's study type, using the JBI questions to extract data per paper for the GRADE scoring, reducing the quality for each instance of the factors mentioned above.

### Risk of bias

The Cochrane Collaboration's tool for assessing risk of bias was used in terms of selection, performance, detection, attrition, reporting and other biases. The 'other' bias category incorporates risks of bias based on:

- Study population (experimental studies);
- Length of follow-up (experimental studies);
- Overall length of study (non-RCTs);
- Self-reported adherence (all studies);
- Reporting quality and quality of the included studies (reviews of the literature).

## RESULTS

### Literature search results

**Error! Reference source not found.** illustrates the literature search and selection method, presenting explanations for the exclusion of studies. Once duplicates were removed, a total of 1787 original works were identified and 23 were finally included in the qualitative synthesis.

Literature review

### Characteristics of included studies

This review includes studies conducted in the USA (n=7), globally (n=7), and in Switzerland (n=2). Most studies had included participants, which have least one long term condition (n=9), diabetes (n=5) and HIV (n=3). Most studies were published in 2014 (n=6), 2016 (n=4) and 2017 (n=4). The majority of the included studies (n = 18) reported a positive result in terms of the impact on medication adherence, with four studies identifying mixed results [19–22] and two studies found no difference.[23,24] No study identified negative results. Eight out of 10 high quality studies and nine out of 13 moderate quality studies found positive results with medication adherence. The main study characteristics are illustrated in Table 2.

For peer review only



## Literature review

Table 2 Included Studies Characteristics

| Study                      | Study type                   | Participants |            |            |                              | Intervention           | Control    |                     | Medication adherence assessment  | Long Term Condition               | Follow-up (months) | Medication adherence results | Quality  |
|----------------------------|------------------------------|--------------|------------|------------|------------------------------|------------------------|------------|---------------------|----------------------------------|-----------------------------------|--------------------|------------------------------|----------|
|                            |                              | Number       | Mean Age   | Male %     | Education (>= high school %) |                        | Number     | Type of Care        |                                  |                                   |                    |                              |          |
| <b>Allam (2015)</b>        | RCT                          | 155          | 57.96      | 54.1       | 76.1                         | ONESelf                | 40         | Usual care          | Prescription Opioid Misuse Index | Rheumatoid arthritis              | 4                  | Positive                     | Moderate |
| <b>Chrischilles (2014)</b> | RCT                          | 1075         | 72.3       | 43.2       | 98.7                         | Iowa PHR               | 273        | Usual care          | Self-reported                    | At least one                      | 12                 | No difference                | Moderate |
| <b>Dabbs (2016)</b>        | RCT                          | 201          | 62         | 55.2       | 94                           | Pocket PATH            | Not stated | Usual care          | Health Habits Survey             | Lung transplant recipients (LTRs) | 12                 | Positive                     | High     |
| <b>Dorr (2007)</b>         | Systematic Literature Review | n/a          | n/a        | n/a        | n/a                          | More than one          | n/a        | Usual care          | n/a                              | At least one                      | n/a                | Mixed                        | Moderate |
| <b>Fioravanti (2015)</b>   | RCT                          | 51           | Not stated | Not stated | Not stated                   | More than one          | 25         | Usual care          | Self-reported                    | Diabetes (all types)              | 1                  | Positive                     | Moderate |
| <b>Glaser (2017)</b>       | RCT                          | 221          | Not stated | 58.4       | 72                           | Self                   | Not stated | Usual care          | Lab results                      | At least one                      | 9                  | Positive                     | High     |
| <b>Glasgow (2012)</b>      | RCT                          | 332          | 61.4       | 95         | 86                           | My Path to Health Life | Not stated | Enhanced Usual care | Hill-Bone scale                  | Diabetes type 2                   | 12                 | No difference                | Moderate |

## Literature review

|                               |                              |     |            |      |            |                     |            |            |                                            |                          |     |  |          |          |
|-------------------------------|------------------------------|-----|------------|------|------------|---------------------|------------|------------|--------------------------------------------|--------------------------|-----|--|----------|----------|
| <b>Grant (2008)</b>           | RCT                          | 244 | Not stated | 51   | Not stated | Not named           | 118        | Usual care | Medication initiation or dosage adjustment | Diabetes type 2          | 12  |  | Positive | High     |
| <b>Harrison (2014)</b>        | Systematic Literature Review | n/a | n/a        | n/a  | n/a        | More than one       | n/a        | Usual care | n/a                                        | Diabetes (all types)     | n/a |  | Positive | Moderate |
| <b>Lakshminarayana (2017)</b> | RCT                          | 201 | 60.3       | 60.7 |            | Parkinson's Tracker | 90         | Usual care | MMAS-8                                     | Parkinson's disease (PD) | 4   |  | Positive | Moderate |
| <b>Luque (2012)</b>           | RCT                          | 29  | 48         | 55   | 69         | MyMedical           | n/a        | Usual care | Self-reported                              | HIV                      | 2   |  | Positive | Moderate |
| <b>McDermott (2013)</b>       | Systematic Literature Review | n/a | n/a        | n/a  | n/a        | More than one       | Not stated | Usual care | n/a                                        | At least one             | n/a |  | Positive | High     |
| <b>McLean (2016)</b>          | Systematic Literature Review | n/a | n/a        | n/a  | n/a        | More than one       | Not stated | Usual care | n/a                                        | Asthma                   | n/a |  | Mixed    | High     |
| <b>Mira (2014)</b>            | RCT                          | 99  | 71.9       | 55.5 | Not stated | ALICE               | 48         | Usual care | MMAS-4                                     | At least one             | 11  |  | Positive | Moderate |
| <b>Mistry (2015)</b>          | Systematic Literature Review | n/a | n/a        | n/a  | n/a        | More than one       | n/a        | Usual care | n/a                                        | At least one             | n/a |  | Positive | High     |

## Literature review

|                           |                              |     |      |     |            |               |            |            |                                                               |                         |     |          |          |
|---------------------------|------------------------------|-----|------|-----|------------|---------------|------------|------------|---------------------------------------------------------------|-------------------------|-----|----------|----------|
| <b>Morton (2017)</b>      | Systematic Literature Review | n/a | n/a  | n/a | n/a        | More than one | n/a        | Usual care | n/a                                                           | At least one            | n/a | Positive | High     |
| <b>Park (2014)</b>        | Systematic Literature Review | n/a | n/a  | n/a | n/a        | More than one | n/a        | Usual care | n/a                                                           | At least one            | n/a | Mixed    | High     |
| <b>Perera (2014)</b>      | RCT                          | 28  | 46   | 93  | Not stated | Not named     | 11         | Usual care | MARS, pharmacy dispensing records, and lab tests              | HIV                     | 3   | Positive | Moderate |
| <b>Riva (2014)</b>        | RCT                          | 51  | 47.5 | 49  | 76.4       | ONESelf       | 24         | Usual care | Prescription Medication Use and Perception of Risk Instrument | Chronic back pain (CBP) | 5   | Positive | High     |
| <b>Stephani (2016)</b>    | Systematic Literature Review | n/a | n/a  | n/a | n/a        | More than one | n/a        | Usual care | n/a                                                           | At least one            | n/a | Mixed    | Moderate |
| <b>Tang (2013)</b>        | RCT                          | 415 | 53.7 | 60  | 94.3       | Self          | 213        | Usual care | diabetes control                                              | Diabetes type 2         | 12  | Positive | High     |
| <b>Westergaard (2017)</b> | Qualitative                  | 19  | 49.3 | 63  | 74         | More than one | Not stated | Usual care | Self-reported                                                 | HIV                     | n/a | Positive | Moderate |

Literature review

|                     |              |     |      |    |    |      |     |                 |                                          |                         |    |          |          |
|---------------------|--------------|-----|------|----|----|------|-----|-----------------|------------------------------------------|-------------------------|----|----------|----------|
| <b>Zettl (2016)</b> | Cohort Study | 669 | 38.4 | 29 | 28 | Self | 330 | Paper based PDA | Number of injections per study interval. | Multiple sclerosis (MS) | 24 | Positive | Moderate |
|---------------------|--------------|-----|------|----|----|------|-----|-----------------|------------------------------------------|-------------------------|----|----------|----------|

For peer review only

1  
2  
3  
4  
5  
6  
7  
8  
9  
10  
11  
12  
13  
14  
15  
16  
17  
18  
19  
20  
21  
22  
23  
24  
25  
26  
27  
28  
29  
30  
31  
32  
33  
34  
35  
36  
37  
38  
39  
40  
41  
42  
43  
44  
45  
46

## Literature review

**Primary objective**

Table 3 presents the PHR design features that were identified in the literature and are the generated themes of this literature review. The definitions of the PHR design features derive from commercial PHRs that are implementing them or the wider literature regarding PHRs and personal experience, since there are no International Standards Organization (ISO) standards or universally accepted terminology.

Table 3 PHR design features

| Feature                               | Definition                                                                                                                                                                                                                         | Medication adherence results by study |               |       |
|---------------------------------------|------------------------------------------------------------------------------------------------------------------------------------------------------------------------------------------------------------------------------------|---------------------------------------|---------------|-------|
|                                       |                                                                                                                                                                                                                                    | Positive                              | No difference | Mixed |
| <b>Reminder</b>                       | Reminders to take medication or to reorder their prescriptions, agnostic to the patient's chronic condition, demographics or any other external factor.                                                                            | 14                                    | 1             | 4     |
| <b>Education</b>                      | Includes smaller features, like search bars and views, which can improve the user's health literacy and understanding of their condition.                                                                                          | 6                                     | 2             | 1     |
| <b>Personalisation and tailoring</b>  | The personalisation involves presenting a health message specific to the individual patient's condition and demographic characteristics, whilst tailoring involves developing a PHR based on the individual's characteristics.[25] | 11                                    | 1             | -     |
| <b>Feedback and alerts</b>            | Medical emergency alerts in the form of a press button alert or SMS, such as the ones a user may find in the MyALERT PHR.[26]                                                                                                      | 13                                    | 2             | 3     |
| <b>Gamification</b>                   | An umbrella term that includes the use of game design characteristics in non-game contexts.[27]                                                                                                                                    | 6                                     | 1             | 1     |
| <b>Medication management</b>          | Includes all the features that a chronically ill patient may need to conform to everyday life.[28]                                                                                                                                 | 14                                    | 2             | 3     |
| <b>Medical appointment management</b> | Medically related appointment tracking, re-scheduling and arrangement.[29]                                                                                                                                                         | 4                                     | -             | 1     |
| <b>Diary and self-monitoring</b>      | A combination of features related to health or medication intake monitoring.[30]                                                                                                                                                   | 11                                    | 2             | 4     |
| <b>Health condition management</b>    | Includes all the lab and medical tests results and integration of existing clinical data.[25]                                                                                                                                      | 2                                     | 1             | 1     |
| <b>Set goals</b>                      | Includes all the elements that are necessary for setting and managing goals.                                                                                                                                                       | 4                                     | 1             | 1     |
| <b>Patient's blog</b>                 | Includes sharing in social media or blogging regarding health.[31]                                                                                                                                                                 | 2                                     | -             | -     |
| <b>Tethered</b>                       | Are the PHRs which are connected with an electronic health record (EHR).[32]                                                                                                                                                       | 4                                     | -             | -     |

All the PHR design features, which are constitute the themes derived from our thematic analysis,[33] are interlinked and overlap. NVivo 11 was used to cluster our codes into potentially more

## Literature review

comprehensive themes. The initial themes were clustered together based on coding similarity, which means that if there were coding many of the same included studies, they then were clustered together.

- reminder and medical appointment management (used in 5 studies)
- diary and self-monitoring (used in 17 studies)
- feedback and alerts and health condition management (used in 4 studies)
- medication management and patients blog (used in 2 studies)
- personalisation & tailoring (used in 12 studies)
- gamification (used in 8 studies)
- education and set goals (used in 6 studies)

## Secondary objectives

PHR design features that improve medication adherence in case of polypharmacy  
Even though multiple papers are including polypharmacy or multi-morbidity factors about their participants, they do not explore whether there is a correlation or an association between polypharmacy and the PHR usage or medication adherence improvement or not. There is a trend that the more medications a person uses the less a reminder helps, but this is not a conclusion directly supported by the data, but an argument emerging from multiple studies.[24,31,34,35]

PHR design features that improve medication adherence for specific long term condition groups

This research identified a number of chronic conditions. However, only diabetes and HIV can be used to analyse the impact that the PHR design features are having in medication adherence, since the rest of the conditions are included in just one study.

### *HIV*

Three studies have been included that discuss how the use of PHRs affect medication adherence of adults with HIV.[35–37] All three studies produced positive results, having a very small (less than 50) number of participants that are also predominantly male and younger than 50 years old. Two studies are RCTs,[36,37] having follow-up duration of 2 to 3 months and the other one is a qualitative study [35] without any follow-up. All three studies include the personalisation and tailoring design feature, two of the studies use reminders, one study uses feedback and alerts and health condition management and one other study uses diary and self-monitoring design feature.

### *Diabetes*

Five studies have been included that discuss how the use of PHRs affect medication adherence of adults with diabetes.[23,38–41] All studies found positive results regarding medication adherence, apart from Glasgow *et al.*[23] Four studies used diary and self-monitoring [23,38–40] or personalisation and tailoring,[23,38,40,41] three studies used education and set goals [23,38,40] or gamification [23,38,41] and one [40] used feedback and alerts and health condition management PHR design features. All studies were RCTs apart from Harrison *et al.*[39] The RCTs follow-up duration was 12 months apart from Fioravanti *et al.*,[38] which was 1 month.

Association between participants' demographic characteristics, their usage of PHRs and their medication adherence

Data regarding patients' demographics and medication adherence were collected and analysed. This analysis excludes the 8 literature reviews, since it was impossible to collect accurate demographics from them. Only two [36,42] of the 15 studies provide a detailed description of the participants'

## Literature review

1  
2  
3 ethnicity. Two studies [43,44] are also providing data regarding the technology literacy of the  
4 participants and two other studies [23,36] provide data for the health literacy of the participants.  
5

6 Twelve of the 15 studies provided age group details, which illustrate that the younger the  
7 participants, the more positive results regarding medication adherence were identified. This could  
8 be due to the presumed technological literacy of younger generations, however it was impossible to  
9 account for this confounding factor, since no data were supplied. Also the lower the number of  
10 participants in an experimental study (less than 251), the higher the impact of PHR in medication  
11 adherence. This could arguably illustrate a case of confirmation bias, meaning that the researcher  
12 stopped recruitment when the hypothesis was verified. It could also mean that some of these results  
13 are less accurate, due to lower number of participants, since there is uncertainty towards the validity  
14 of the results derived from RCTs with less than 100 participants.  
15  
16

### How implementation factors affect the outcomes and heterogeneity

17 Heterogeneity has been found in the included studies regarding the study location, the included  
18 long-term conditions and the medication adherence measurement method. Although, the included  
19 study types were also heterogenic (Table 2), this does not seem to affect the general trend that the  
20 use of PHR has a positive impact in medication adherence. Heterogeneity has also been identified in  
21 participants' demographics and confounding factors (Table 2).  
22  
23

24 Although expected otherwise, the duration of the follow-up in RCT studies does not seem to affect  
25 the outcomes, since the majority of the included RCTs produced positive results. There is however  
26 and indication that three out of four RCT studies that did not produce positive results had a 12  
27 months follow-up. This observation is in-line with the general idea of the field being new and there  
28 are no global standards that dictate the design of PHRs. Another interesting fact is that the studies  
29 that were either observational or literature reviews produced statistically more positive results than  
30 the RCTs.  
31  
32

### Quality assessment

33 The inter-rater reliability between EA and PS was calculated to  $k=0.88$ , which indicates that the  
34 reliability of the quality assessment is likely to be high. Overall, 35 studies matched our inclusion  
35 criteria. 12 of these studies were excluded due to low quality of evidence, 10 were graded as high  
36 quality of evidence and the remaining 13 as moderate quality of evidence. The detailed quality  
37 assessment table based on the GRADE approach can be found in the additional file.  
38  
39

40 **Error! Reference source not found.** illustrates the overall risk of bias for this study. The details  
41 behind this diagram are provided as additional file.  
42  
43  
44  
45  
46  
47  
48

## DISCUSSION

49 In this section we reflect upon the principal themes and overall conclusions from the literature  
50 review. A first impression after the initial data analysis was that too few studies actually mentioned  
51 the term PHR. In the majority of the cases we had to critique the intervention of the inclusion  
52 criteria based on our PHR definition. This systematic review included 23 studies of multiple study  
53 types and identified 12 different PHR design features. Although 12 different PHR design features  
54 were identified, there are no specific guidelines that can be derived from the results. Overall, 74%  
55 ( $n=17$ ) of the included studies found that the use of a PHR has increased medication adherence.  
56 Based on the number of studies that identified positive results, the fact that 8 out of the 10 high  
57 quality studies identified positive results and that no study indicated a negative effect on medication  
58  
59  
60

## Literature review

adherence, we conclude that there is a reasonable indication that PHRs can have an overall positive effect on medication adherence. However, due to the high heterogeneity in medication adherence measurements, reporting styles and study types, we were unable to group and quantify the results in study level. It is of course possible that the absence of negative results is due to publication bias.

Reminders and medication management are the most commonly used PHR design feature, since only four of the included 23 studies do not include either of the two. The generated clusters paint a similar picture. The cluster that produces the best results is medication management and patient's blog (100% of studies in this cluster produce positive results), followed by personalisation & tailoring (92% of studies in this cluster produce positive results) and reminder and medical appointment management (80% of studies in this cluster produce positive results). These findings are also consistent with the existing literature, which identifies reminders as a generally helpful tool for patients to remember to take or order their medication.[45]

Two groups of patients have been identified in this literature review for further analysis, to find which of the PHR design features work best for them. The most positive results for diabetic participants were identified by four studies [23,38–40] that used PHRs. Furthermore, for participants with HIV, three studies were identified producing positive results [35–37] that used at least personalisation and tailoring design feature and reminders. Mixed associations were found between patients demographics, their PHR usage and medication adherence. Taking into account the median age confounding factor of the participants, then it is apparent that the younger the participants, the more positive results identified. This is also supported in the general academic literature that suggest that technological literacy levels are higher in younger adult population.[46,47]

Furthermore, the less participants a study included the more positive the results appeared to be. This in fact may cause problems in the quality of evidence for the included studies and this literature review; hence our suggestion to interpret the results with caution. There is a proven link between the sample size of an RCT and the statistical significance of its result.[48] According to Faber *et al*,[49] the small sample size might increase the chance of a false-positive and the study might not reach to a evident conclusion.

The 'other' bias category has the highest risk of bias of all the assessed risks, which is in line with the key findings of this and other related studies,[50] resulting in a probable overestimation of PHR effect on medication adherence and potentially echoing a form of recall bias.[51] Although some degree of bias is considered unavoidable, the high risk of bias identified in the included studies and the generally moderate quality of evidence presented in them also reflects the uncertainty on this field and the need for further research on both PHRs and medication adherence. A PHR design feature that is not mentioned in the included literature is security. This might be happening due to the inclusion/exclusion criteria of this systematic review, since the security of the data does not seem to affect patients' medication adherence. Another limitation is that we included English papers published in the last 15 years, due to time and cost constraints. Furthermore, the small number of participants in the studies is commonly known to overestimate the effect of an intervention, fact which is noticeable in the included studies.

## FUNDING STATEMENT

This research received no specific grant from any funding agency in the public, commercial or not-for-profit sectors.



Literature review

## COMPETING INTERESTS STATEMENT

None declared.

## DATA SHARING STATEMENT

No additional data are available.

## PATIENT AND PUBLIC INVOLVEMENT

PPI has already been involved in the design of this research. On 22 of June 2018, a PPI focus group with 8 participants took place at the University of Portsmouth. This group's suggestions are taken into consideration by the research team. The PPI group approved the focus of this review and provided guidelines for future research.

## PATIENT CONSENT

Not required.

## AUTHOR CONTRIBUTION

EA drafted the manuscript, and is the guarantor of the review. PJS revised the manuscript multiple times for methodological and intellectual content. HH revised the manuscript twice for methodological, conceptual and intellectual content from a pharmaceuticals' perspective. AG also revised the manuscript for methodological, conceptual and intellectual content and also contributed in the abstract design. The final version of the manuscript was approved by all three authors.

## ACKNOWLEDGEMENTS

The authors would like to acknowledge Dr Nicola Barnes and Dr Penny Ross, for providing academic insight and support. The authors would also like to acknowledge the participants of the PPI group for their insightful feedback and time.

## REFERENCES

- 1 National Information Board, Department of Health. Personalised health and care 2020: a framework for action. 2014. doi:10.1177/0272989X06295361
- 2 Public Health England - Trust Development Authority. NHS England Care Quality Commission Health Education England Monitor. Five Year Forward View. 2014. <https://www.england.nhs.uk/wp-content/uploads/2014/10/5yfv-web.pdf>

## Literature review

- 1  
2  
3 Office for National Statistics. Internet users in the UK.  
4 2016.<https://www.ons.gov.uk/businessindustryandtrade/itandinternetindustry/bulletins/internetusers/2016> (accessed 25 Sep 2018).  
5  
6  
7  
8 Deloitte. 2017 Global Health Care Sector Outlook.  
9 2017;:2015.<https://www2.deloitte.com/content/dam/Deloitte/global/Documents/Life-Sciences-Health-Care/gx-lshc-2015-health-care-outlook-infographic.pdf>  
10  
11  
12 5 Andrikopoulou E, Scott PJ, Herrera H. Important Design Features of Personal Health Records  
13 to Improve Medication Adherence for Patients with Long-Term Conditions: Protocol for a Systematic  
14 Literature Review. *JMIR Res Protoc* 2018;**7**:e159. doi:10.2196/resprot.9778  
15  
16 6 Price M, Bellwood P, Kitson N, *et al*. Conditions potentially sensitive to a personal health  
17 record (PHR) intervention, a systematic review. *BMC Med Inf Decis Mak* 2015;**15**:32.  
18 doi:10.1186/s12911-015-0159-1  
19  
20 7 Institute of Medicine. *Health IT and Patient Safety*. Washington, D.C.: National Academies  
21 Press 2012. doi:10.17226/13269  
22  
23 8 Moorhead P, Zavala A, Kim Y, *et al*. Efficacy and safety of a medication dose reminder  
24 feature in a digital health offering with the use of sensor-enabled medicines. *J Am Pharm Assoc*  
25 2017;**57**:155–161.e1. doi:10.1016/j.japh.2016.12.067  
26  
27 9 De Geest S, Sabaté E. Adherence to long-term therapies: Evidence for action. 2003.  
28 doi:10.1016/S1474-5151(03)00091-4  
29  
30 10 Vrijens B, Dima AL, Van Ganse E, *et al*. What We Mean When We Talk About Adherence in  
31 Respiratory Medicine. *J Allergy Clin Immunol Pract* 2016;**4**:802–12. doi:10.1016/j.jaip.2016.05.019  
32  
33 11 Knobloch K, Yoon U, Vogt PM. Preferred reporting items for systematic reviews and meta-  
34 analyses (PRISMA) statement and publication bias. *J Cranio-Maxillofacial Surg* 2011;**39**:91–2.  
35 doi:10.1016/j.jcms.2010.11.001  
36  
37 12 Joanna Briggs Institute. Critical Appraisal Tools. Retrieved May. 2005;**6**:2006.  
38 doi:10.1002/9780470988343.app1/pdf  
39  
40 13 Cochrane. GRADE approach | Cochrane Training. 2018.<https://training.cochrane.org/grade-approach> (accessed 4 Oct 2018).  
41  
42 14 Guyatt GH, Oxman AD, Vist G, *et al*. GRADE guidelines: 4. Rating the quality of evidence -  
43 Study limitations (risk of bias). *J. Clin. Epidemiol.* 2011;**64**:407–15. doi:10.1016/j.jclinepi.2010.07.017  
44  
45 15 Guyatt GH, Oxman AD, Kunz R, *et al*. GRADE guidelines: 7. Rating the quality of evidence -  
46 Inconsistency. *J Clin Epidemiol* 2011;**64**:1294–302. doi:10.1016/j.jclinepi.2011.03.017  
47  
48 16 Guyatt GH, Oxman AD, Kunz R, *et al*. GRADE guidelines: 8. Rating the quality of evidence -  
49 Indirectness. *J Clin Epidemiol* 2011;**64**:1303–10. doi:10.1016/j.jclinepi.2011.04.014  
50  
51 17 Guyatt GH, Oxman AD, Kunz R, *et al*. GRADE guidelines 6. Rating the quality of evidence -  
52 Imprecision. *J Clin Epidemiol* 2011;**64**:1283–93. doi:10.1016/j.jclinepi.2011.01.012  
53  
54 18 Guyatt GH, Oxman AD, Montori V, *et al*. GRADE guidelines: 5. Rating the quality of evidence -  
55 Publication bias. *J Clin Epidemiol* 2011;**64**:1277–82. doi:10.1016/j.jclinepi.2011.01.011  
56  
57  
58  
59  
60

## Literature review

- 1  
2  
3 19 Park LG, Howie-Esquivel J, Dracup K. A quantitative systematic review of the efficacy of  
4 mobile phone interventions to improve medication adherence. *J Adv Nurs* 2014;**70**:1932–53.  
5 doi:10.1111/jan.12400  
6
- 7 20 McLean G, Murray E, Band R, *et al.* Interactive digital interventions to promote self-  
8 management in adults with asthma: systematic review and meta-analysis. *BMC Pulm Med*  
9 2016;**16**:83. doi:10.1186/s12890-016-0248-7  
10
- 11 21 Stephani V, Opoku D, Quentin W. A systematic review of randomized controlled trials of  
12 mHealth interventions against non-communicable diseases in developing countries. *BMC Public*  
13 *Health* 2016;**16**:572. doi:10.1186/s12889-016-3226-3  
14
- 15 22 Dorr D, Bonner LM, Cohen AN, *et al.* Informatics Systems to Promote Improved Care for  
16 Chronic Illness: A Literature Review. *J Am Med Informatics Assoc* 2007;**14**:156–63.  
17 doi:10.1197/jamia.M2255  
18
- 19 23 Glasgow RE, Kurz D, King D, *et al.* Twelve-month outcomes of an Internet-based diabetes  
20 self-management support program. *Patient Educ Couns* 2012;**87**:81–92.  
21 doi:10.1016/j.pec.2011.07.024  
22
- 23 24 Chrischilles EA, Hourcade JP, Doucette W, *et al.* Personal health records: a randomized trial  
24 of effects on elder medication safety. *J Am Med Inform Assoc* 2014;**21**:679–86. doi:10.1136/amiajnl-  
25 2013-002284  
26
- 27 25 Househ MS, Borycki EM, Rohrer WM, *et al.* Developing a framework for meaningful use of  
28 personal health records (PHRs). *Heal Policy Technol* 2014;**3**:272–80. doi:10.1016/j.hlpt.2014.08.009  
29
- 30 26 ALERT Life Sciences Computing. MyALERT® - Personal Health Record.  
31 2010.<http://www.alert-online.com/myalert> (accessed 26 Oct 2017).  
32
- 33 27 Deterding S, Sicart M, Nacke L, *et al.* Gamification. using game-design elements in non-  
34 gaming contexts. In: *Proceedings of the 2011 annual conference extended abstracts on Human*  
35 *factors in computing systems - CHI EA '11*. New York, New York, USA: : ACM Press 2011. 2425.  
36 doi:10.1145/1979742.1979575  
37
- 38 28 Dalgaard LG, Grönvall E, Verdezoto N. Accounting for Medication Particularities: Designing  
39 for Everyday Medication Management. In: *Proceedings of the 7th International Conference on*  
40 *Pervasive Computing Technologies for Healthcare*. ICST, Brussels, Belgium, Belgium: : ICST (Institute  
41 for Computer Sciences, Social-Informatics and Telecommunications Engineering) 2013. 137–44.  
42 doi:10.4108/icst.pervasivehealth.2013.252058  
43
- 44 29 Wagner PJ, Dias J, Howard S, *et al.* Personal health records and hypertension control: a  
45 randomized trial. *J Am Med Informatics Assoc* 2012;**19**:626–34. doi:10.1136/amiajnl-2011-000349  
46
- 47 30 Zetl UK, Bauer-Steinhusen U, Glaser T, *et al.* Evaluation of an electronic diary for  
48 improvement of adherence to interferon beta-1b in patients with multiple sclerosis: design and  
49 baseline results of an observational cohort study. *BMC Neurol* 2013;**13**:117. doi:10.1186/1471-2377-  
50 13-117  
51
- 52 31 Allam A, Kostova Z, Nakamoto K, *et al.* The effect of social support features and gamification  
53 on a web-based intervention for rheumatoid arthritis patients: Randomized controlled trial. *J Med*  
54 *Internet Res* 2015;**17**:e14. doi:10.2196/jmir.3510  
55
- 56  
57  
58  
59  
60

## Literature review

- 1  
2  
3 32 Vydra, T. P., Cuaresma, E., Kretovics, M., & Bose-Brill S. Diffusion and use of tethered  
4 \tpersonal health records in primary care. *Perspect Heal Inf \tManagement* 2015;**12**:1c.  
5  
6 33 Braun V, Clarke V. Using thematic analysis in psychology. *Qual Res Psychol* 2006;**3**:77–  
7 101.<http://eprints.uwe.ac.uk/11735>  
8  
9 34 Glaser E, Richard C, Lussier M-T. The impact of a patient web communication intervention on  
10 reaching treatment suggested guidelines for chronic diseases: A randomized controlled trial. *Patient*  
11 *Educ Couns* 2017;**23**–5. doi:10.1016/j.pec.2017.05.022  
12  
13 35 Westergaard RP, Genz A, Panico K, *et al.* Acceptability of a mobile health intervention to  
14 enhance HIV care coordination for patients with substance use disorders. *Addict Sci Clin Pract*  
15 2017;**12**:11. doi:10.1186/s13722-017-0076-y  
16  
17 36 Luque AE, Corales R, Fowler RJ, *et al.* Bridging the digital divide in HIV care: a pilot study of  
18 an iPod personal health record. *J Int Assoc Provid AIDS Care* 2012;**12**:117–21.  
19 doi:10.1177/1545109712457712  
20  
21 37 Perera AI, Thomas MG, Moore JO, *et al.* Effect of a Smartphone Application Incorporating  
22 Personalized Health-Related Imagery on Adherence to Antiretroviral Therapy: A Randomized Clinical  
23 Trial. *AIDS Patient Care STDS* 2014;**28**:579–86. doi:10.1089/apc.2014.0156  
24  
25 38 Fioravanti A, Fico G, Salvi D, *et al.* Automatic messaging for improving patients engagement  
26 in diabetes management: an exploratory study. *Med Biol Eng Comput* 2015;**53**:1285–94.  
27 doi:10.1007/s11517-014-1237-8  
28  
29 39 Harrison S, Stadler M, Ismail K, *et al.* Are Patients with Diabetes Mellitus Satisfied with  
30 Technologies Used to Assist with Diabetes Management and Coping?: A Structured Review. *Diabetes*  
31 *Technol Ther* 2014;**16**:771–83. doi:10.1089/dia.2014.0062  
32  
33 40 Tang PC, A J, Bates DW, *et al.* Personal Health Records: Definitions, Benefits, and Strategies  
34 fro Overcoming Barriers to Adoption. *J Am Med Informatics Assoc* 2006;**13**:121–7.  
35 doi:10.1197/jamia.M2025.records  
36  
37 41 Grant RW, Wald JS, Schnipper JL, *et al.* Practice-linked online personal health records for  
38 type 2 diabetes mellitus: a randomized controlled trial. *Arch Intern Med.* 2008;**168**:1776–82.  
39 doi:168/16/1776 [pii]\r10.1001/archinte.168.16.1776  
40  
41 42 Tang PC, Overhage JM, Chan AS, *et al.* Online disease management of diabetes: Engaging  
42 and Motivating Patients Online With Enhanced Resources-Diabetes (EMPOWER-D), a randomized  
43 controlled trial. *J Am Med Informatics Assoc* 2013;**20**:526–34. doi:10.1136/amiajnl-2012-001263  
44  
45 43 DeVito Dabbs A, Song MK, Myers BA, *et al.* A Randomized Controlled Trial of a Mobile Health  
46 Intervention to Promote Self-Management After Lung Transplantation. *Am J Transplant*  
47 2016;**16**:2172–80. doi:10.1111/ajt.13701  
48  
49 44 Zetl UK, Bauer-Steinhusen U, Glaser T, *et al.* Adherence to Long-Term Interferon Beta-1b  
50 Injection Therapy in Patients with Multiple Sclerosis Using an Electronic Diary. *Adv Ther*  
51 2016;**33**:834–47. doi:10.1007/s12325-016-0325-6  
52  
53 45 Hayes TL, Cobbinah K, Dishongh T, *et al.* A study of medication-taking and unobtrusive,  
54 intelligent reminding. *Telemed J E Health* 2009;**15**:770–6. doi:10.1089/tmj.2009.0033  
55  
56  
57  
58  
59  
60

## Literature review

- 1  
2  
3 46 Bastion S. The development of a valid and reliable measure of technological literacy for  
4 adults. *Diss Abstr Int Sect A Humanit Soc Sci* 2015;**76**:No-  
5 Specified.<http://ovidsp.ovid.com/ovidweb.cgi?T=JS&PAGE=reference&D=psyc12&NEWS=N&AN=2015-99211-356>  
6  
7  
8  
9 47 Sharp LA. Collaborative Digital Literacy Practices among Adult Learners: Levels of Confidence  
10 and Perceptions of Importance. *Int J Instr* 2018;**11**:153–66. doi:10.12973/iji.2018.11111a  
11  
12 48 Walsh M, Srinathan SK, McAuley DF, *et al*. The statistical significance of randomized  
13 controlled trial results is frequently fragile: A case for a Fragility Index. *J Clin Epidemiol* 2014;**67**:622–  
14 8. doi:10.1016/j.jclinepi.2013.10.019  
15  
16 49 Faber J, Fonseca LM. How sample size influences research outcomes. *Dental Press J Orthod*  
17 2014;**19**:27–9. doi:10.1590/2176-9451.19.4.027-029.ebo  
18  
19 50 Showell C. Barriers to the use of personal health records by patients: a structured review.  
20 *PeerJ* 2017;**5**:e3268. doi:10.7717/peerj.3268  
21  
22 51 Tsai KT, Chen JH, Wen CJ, *et al*. Medication adherence among geriatric outpatients  
23 prescribed multiple medications. *Am J Geriatr Pharmacother* 2011;**10**:61–8.  
24 doi:10.1016/j.amjopharm.2011.11.005  
25  
26  
27  
28  
29  
30  
31  
32  
33  
34  
35  
36  
37  
38  
39  
40  
41  
42  
43  
44  
45  
46  
47  
48  
49  
50  
51  
52  
53  
54  
55  
56  
57  
58  
59  
60

1  
2  
3  
4  
5  
6  
7  
8  
9  
10  
11  
12  
13  
14  
15  
16  
17  
18  
19  
20  
21  
22  
23  
24  
25  
26  
27  
28  
29  
30  
31  
32  
33  
34  
35  
36  
37  
38  
39  
40  
41  
42  
43  
44  
45  
46  
47  
48  
49  
50  
51  
52  
53  
54  
55  
56  
57  
58  
59  
60

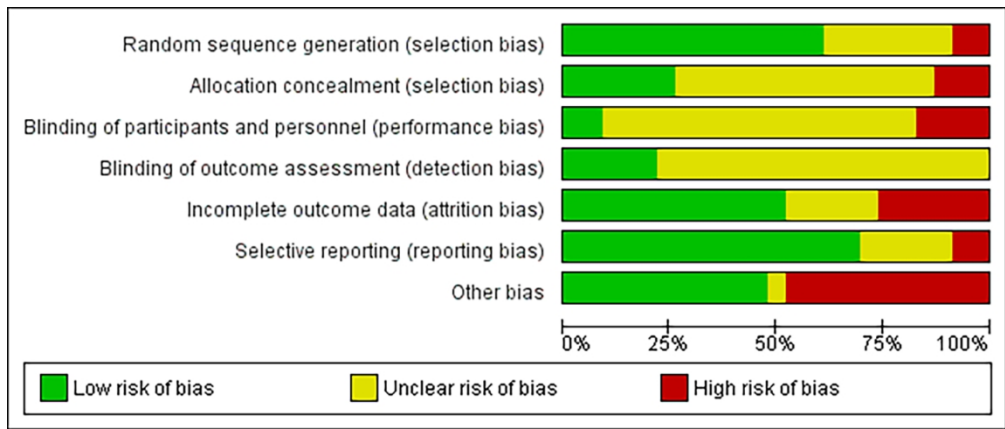

Risk of bias graph

160x67mm (300 x 300 DPI)

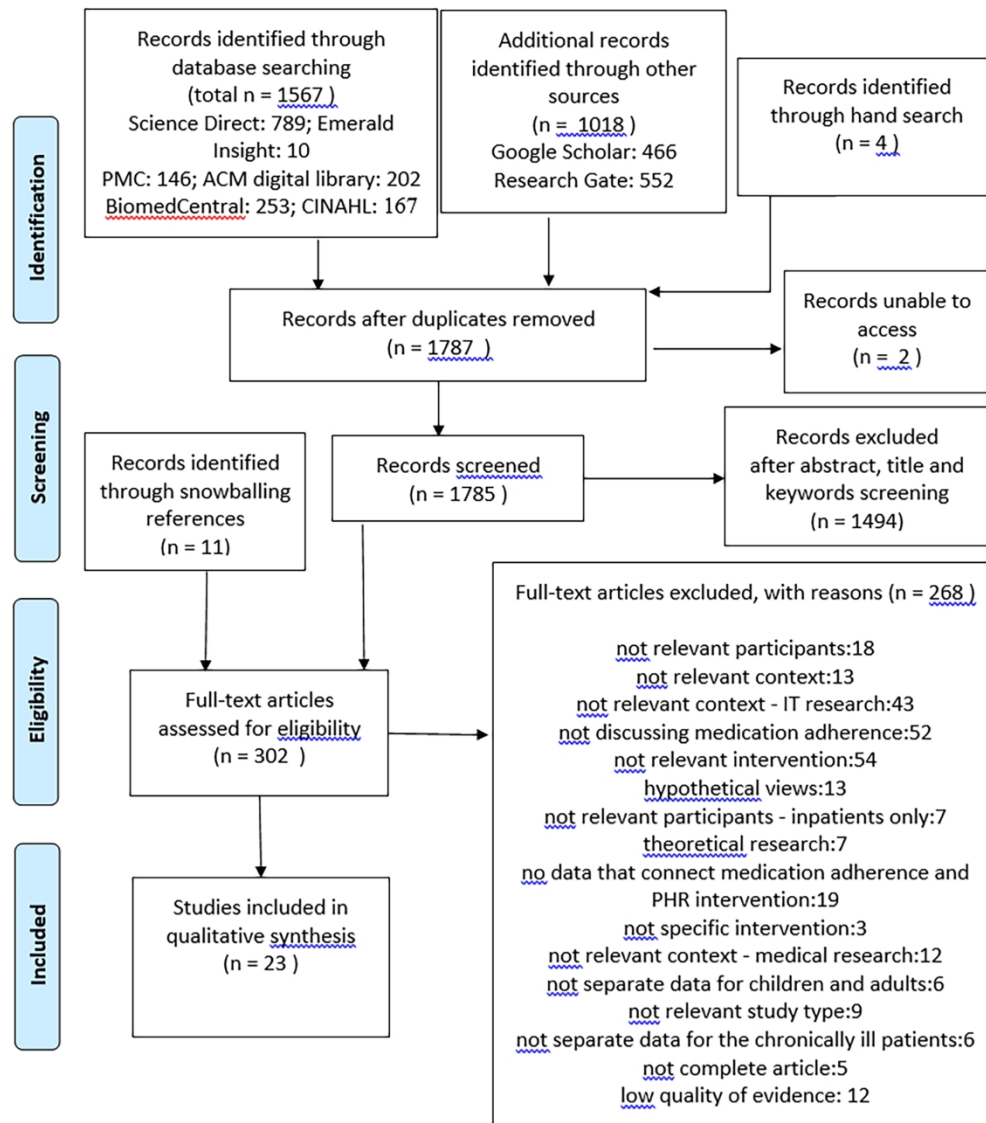

Overview of the literature selection process

204x230mm (300 x 300 DPI)

| Study                         | Study Type                          | Starting Point | Risk of Bias    | Inconsistency | Indirectness | Imprecision  | Publication bias | Quality of evidence |
|-------------------------------|-------------------------------------|----------------|-----------------|---------------|--------------|--------------|------------------|---------------------|
| Allam 2015                    | RCT                                 | high           | Unclear (-1)    | Unclear (-1)  | Unlikely     | Unclear (-1) | Unlikely         | Low                 |
| Chrischilles 2014             | RCT                                 | high           | Unclear (-1)    | Unlikely      | Unclear (-1) | High (-2)    | Unlikely         | Low                 |
| 1<br>2<br>Dalgaard 2013       | Case series                         | low            | High (-2)       | Unlikely      | Unlikely     | High (-2)    | Unlikely         | Very Low            |
| 3<br>4<br>Bravanti 2015       | RCT                                 | high           | Unclear (-1)    | Unlikely      | Unlikely     | Unclear (-1) | Unclear (-1)     | Moderate            |
| 5<br>6<br>Foreman 2012        | cohort study                        | moderate       | Unclear (-1)    | Unlikely      | Unlikely     | Unclear (-1) | Unlikely         | Low                 |
| 7<br>8<br>Glaser 2017         | RCT                                 | high           | No risk of bias | Unlikely      | Unlikely     | Unlikely     | Unlikely         | High                |
| 9<br>10<br>Glasgow 2012       | RCT                                 | high           | Unclear (-1)    | Unclear (-1)  | Unlikely     | Unclear (-1) | Unlikely         | Low                 |
| 11<br>12<br>Hou 2012          | cohort study                        | moderate       | Unclear (-1)    | High (-2)     | Unlikely     | Unlikely     | Unlikely         | Low                 |
| 13<br>14<br>Kaplan 2013       | systematic literature review        | high           | Unclear (-1)    | Unclear (-1)  | Unlikely     | Unclear (-1) | High (-2)        | Low                 |
| 15<br>16<br>Keith 2013        | cross sectional study               | low            | Unclear (-1)    | Unlikely      | Unlikely     | Unlikely     | Unlikely         | Low                 |
| 17<br>18<br>Lee 2014          | RCT                                 | high           | High (-2)       | High (-2)     | Unlikely     | Unlikely     | Unlikely         | Low                 |
| 19<br>20<br>Liu 2012          | RCT                                 | high           | Unclear (-1)    | Unlikely      | Unlikely     | Unlikely     | Unclear (-1)     | Moderate            |
| 21<br>22<br>McDermott 2013    | systematic literature review        | high           | Unclear (-1)    | Unlikely      | Unclear (-1) | Unlikely     | Unlikely         | Moderate            |
| 23<br>24<br>McGillicuddy 2013 | RCT                                 | high           | Unclear (-1)    | Unlikely      | Unclear (-1) | Unclear (-1) | Unclear (-1)     | Low                 |
| 25<br>26<br>McLean 2016       | systematic literature review with m | high           | Unclear (-1)    | Unlikely      | Unlikely     | Unlikely     | Unlikely         | High                |
| 27<br>28<br>Mistry 2015       | systematic literature review        | high           | Unclear (-1)    | Unlikely      | Unlikely     | Unlikely     | Unlikely         | High                |
| 29<br>30<br>Morton 2017       | systematic literature review        | high           | Unclear (-1)    | Unlikely      | Unlikely     | Unclear (-1) | Unlikely         | Moderate            |
| 31<br>32<br>Naslund 2017      | narrative literature review         | high           | High (-2)       | Unlikely      | Unlikely     | Unclear (-1) | Unclear (-1)     | Low                 |
| 33<br>34<br>Park 2014         | systematic literature review        | high           | Unclear (-1)    | Unlikely      | Unlikely     | Unlikely     | Unclear          | High                |
| 35<br>36<br>Pavel 2013        | RCT                                 | high           | Unclear (-1)    | Unlikely      | Unlikely     | High (-2)    | Unclear (-1)     | Low                 |
| 37<br>38<br>Riva 2014         | RCT                                 | high           | Unclear (-1)    | Unlikely      | Unlikely     | Unclear (-1) | Unlikely         | Moderate            |
| 39<br>40<br>Singh 2017        | quasi-experimental                  | moderate       | Unclear (-1)    | Unlikely      | Unlikely     | Unclear (-1) | Unlikely         | Low                 |
| 41<br>42<br>Stephani 2016     | systematic literature review        | high           | Unclear (-1)    | Unlikely      | Unlikely     | Unclear (-1) | Unclear          | Moderate            |
| 43<br>44<br>Tang 2013         | RCT                                 | high           | High (-2)       | Unlikely      | Unlikely     | Unlikely     | Unlikely         | Moderate            |
| 45<br>46<br>Vestergaard 2017  | Qualitative study                   | moderate       | Unclear (-1)    | Unlikely      | Unclear (-1) | Unlikely     | Unlikely         | Low                 |
| 47<br>48<br>Yip 2014          | cohort study                        | moderate       | Unclear (-1)    | High (-2)     | Unlikely     | Unlikely     | Unlikely         | Low                 |
| 49<br>50<br>Zettl 2016        | cohort study                        | moderate       | Unclear (-1)    | Unlikely      | Unlikely     | Unclear (-1) | Unlikely         | Low                 |



1  
2  
3  
4  
5  
6  
7  
8  
9  
10  
11  
12  
13  
14  
15  
16  
17  
18  
19  
20  
21  
22  
23  
24  
25  
26  
27  
28  
29  
30  
31  
32  
33  
34  
35  
36  
37  
38  
39  
40  
41  
42  
43  
44  
45  
46  
47  
48  
49  
50  
51  
52  
53  
54  
55  
56  
57  
58  
59  
60

|                      | Random sequence generation (selection bias) | Allocation concealment (selection bias) | Blinding of participants and personnel (performance bias) | Blinding of outcome assessment (detection bias) | Incomplete outcome data (attrition bias) | Selective reporting (reporting bias) | Other bias |
|----------------------|---------------------------------------------|-----------------------------------------|-----------------------------------------------------------|-------------------------------------------------|------------------------------------------|--------------------------------------|------------|
| Allam 2015           | +                                           | +                                       | ?                                                         | ?                                               | -                                        | +                                    | -          |
| Chrischilles 2014    | +                                           | +                                       | ?                                                         | ?                                               | +                                        | +                                    | -          |
| Dabbs 2016           | +                                           | +                                       | ?                                                         | +                                               | +                                        | +                                    | +          |
| Dorr 2007            | +                                           | ?                                       | ?                                                         | ?                                               | ?                                        | -                                    | -          |
| Fioravanti 2015      | ?                                           | ?                                       | ?                                                         | ?                                               | +                                        | +                                    | -          |
| Glaser 2017          | +                                           | +                                       | +                                                         | +                                               | +                                        | +                                    | +          |
| Glasgow 2012         | ?                                           | ?                                       | ?                                                         | ?                                               | +                                        | +                                    | +          |
| Grant 2008           | -                                           | ?                                       | ?                                                         | ?                                               | +                                        | +                                    | +          |
| Harrison 2014        | +                                           | ?                                       | ?                                                         | ?                                               | ?                                        | -                                    | -          |
| Rakshminarayana 2017 | +                                           | +                                       | -                                                         | +                                               | -                                        | +                                    | -          |
| Luque 2012           | ?                                           | ?                                       | ?                                                         | ?                                               | -                                        | +                                    | -          |
| McDermott 2013       | +                                           | ?                                       | ?                                                         | ?                                               | ?                                        | ?                                    | +          |
| McLean 2016          | +                                           | ?                                       | ?                                                         | ?                                               | +                                        | +                                    | +          |
| Mira 2014            | ?                                           | ?                                       | -                                                         | +                                               | +                                        | +                                    | ?          |
| Mistry 2015          | +                                           | ?                                       | ?                                                         | ?                                               | +                                        | ?                                    | +          |
| Morton 2017          | +                                           | -                                       | ?                                                         | ?                                               | -                                        | +                                    | +          |
| Park 2014            | ?                                           | ?                                       | ?                                                         | ?                                               | -                                        | ?                                    | +          |
| Perera 2014          | ?                                           | ?                                       | ?                                                         | ?                                               | +                                        | +                                    | -          |
| Riva 2014            | +                                           | -                                       | +                                                         | ?                                               | +                                        | +                                    | -          |
| Stephani 2016        | +                                           | ?                                       | ?                                                         | ?                                               | -                                        | ?                                    | +          |
| Tang 2013            | +                                           | +                                       | -                                                         | +                                               | +                                        | +                                    | +          |
| Westergaard 2017     | ?                                           | ?                                       | -                                                         | ?                                               | ?                                        | +                                    | -          |
| Zettl 2016           | -                                           | -                                       | ?                                                         | ?                                               | ?                                        | ?                                    | -          |

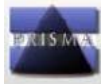

# PRISMA 2009 Checklist

| Section/topic                      | #  | Checklist item                                                                                                                                                                                                                                                                                              | Reported on page # |
|------------------------------------|----|-------------------------------------------------------------------------------------------------------------------------------------------------------------------------------------------------------------------------------------------------------------------------------------------------------------|--------------------|
| <b>TITLE</b>                       |    |                                                                                                                                                                                                                                                                                                             |                    |
| Title                              | 1  | Identify the report as a systematic review, meta-analysis, or both.                                                                                                                                                                                                                                         | 1                  |
| <b>ABSTRACT</b>                    |    |                                                                                                                                                                                                                                                                                                             |                    |
| Structured summary                 | 2  | Provide a structured summary including, as applicable: background; objectives; data sources; study eligibility criteria, participants, and interventions; study appraisal and synthesis methods; results; limitations; conclusions and implications of key findings; systematic review registration number. | 2                  |
| <b>INTRODUCTION</b>                |    |                                                                                                                                                                                                                                                                                                             |                    |
| Rationale                          | 3  | Describe the rationale for the review in the context of what is already known.                                                                                                                                                                                                                              | 3                  |
| Objectives                         | 4  | Provide an explicit statement of questions being addressed with reference to participants, interventions, comparisons, outcomes, and study design (PICOS).                                                                                                                                                  | 3-4                |
| <b>METHODS</b>                     |    |                                                                                                                                                                                                                                                                                                             |                    |
| Protocol and registration          | 5  | Indicate if a review protocol exists, if and where it can be accessed (e.g., Web address), and, if available, provide registration information including registration number.                                                                                                                               | 4                  |
| Eligibility criteria               | 6  | Specify study characteristics (e.g., PICOS, length of follow-up) and report characteristics (e.g., years considered, language, publication status) used as criteria for eligibility, giving rationale.                                                                                                      | 4                  |
| Information sources                | 7  | Describe all information sources (e.g., databases with dates of coverage, contact with study authors to identify additional studies) in the search and date last searched.                                                                                                                                  | 5                  |
| Search                             | 8  | Present full electronic search strategy for at least one database, including any limits used, such that it could be repeated.                                                                                                                                                                               | 5                  |
| Study selection                    | 9  | State the process for selecting studies (i.e., screening, eligibility, included in systematic review, and, if applicable, included in the meta-analysis).                                                                                                                                                   | 5                  |
| Data collection process            | 10 | Describe method of data extraction from reports (e.g., piloted forms, independently, in duplicate) and any processes for obtaining and confirming data from investigators.                                                                                                                                  | 5                  |
| Data items                         | 11 | List and define all variables for which data were sought (e.g., PICOS, funding sources) and any assumptions and simplifications made.                                                                                                                                                                       | 4                  |
| Risk of bias in individual studies | 12 | Describe methods used for assessing risk of bias of individual studies (including specification of whether this was done at the study or outcome level), and how this information is to be used in any data synthesis.                                                                                      | 5                  |
| Summary measures                   | 13 | State the principal summary measures (e.g., risk ratio, difference in means).                                                                                                                                                                                                                               | 4                  |
| Synthesis of results               | 14 | Describe the methods of handling data and combining results of studies, if done, including measures of consistency (e.g., $I^2$ ) for each meta-analysis.                                                                                                                                                   | 13                 |

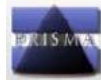

# PRISMA 2009 Checklist

Page 1 of 2

| Section/topic                 | #  | Checklist item                                                                                                                                                                                           | Reported on page # |
|-------------------------------|----|----------------------------------------------------------------------------------------------------------------------------------------------------------------------------------------------------------|--------------------|
| Risk of bias across studies   | 15 | Specify any assessment of risk of bias that may affect the cumulative evidence (e.g., publication bias, selective reporting within studies).                                                             | 5                  |
| Additional analyses           | 16 | Describe methods of additional analyses (e.g., sensitivity or subgroup analyses, meta-regression), if done, indicating which were pre-specified.                                                         | n/a                |
| <b>RESULTS</b>                |    |                                                                                                                                                                                                          |                    |
| Study selection               | 17 | Give numbers of studies screened, assessed for eligibility, and included in the review, with reasons for exclusions at each stage, ideally with a flow diagram.                                          | 6                  |
| Study characteristics         | 18 | For each study, present characteristics for which data were extracted (e.g., study size, PICOS, follow-up period) and provide the citations.                                                             | 7-10               |
| Risk of bias within studies   | 19 | Present data on risk of bias of each study and, if available, any outcome level assessment (see item 12).                                                                                                | 13                 |
| Results of individual studies | 20 | For all outcomes considered (benefits or harms), present, for each study: (a) simple summary data for each intervention group (b) effect estimates and confidence intervals, ideally with a forest plot. | 7-10               |
| Synthesis of results          | 21 | Present results of each meta-analysis done, including confidence intervals and measures of consistency.                                                                                                  | n/a                |
| Risk of bias across studies   | 22 | Present results of any assessment of risk of bias across studies (see Item 15).                                                                                                                          | 13                 |
| Additional analysis           | 23 | Give results of additional analyses, if done (e.g., sensitivity or subgroup analyses, meta-regression [see Item 16]).                                                                                    | n/a                |
| <b>DISCUSSION</b>             |    |                                                                                                                                                                                                          |                    |
| Summary of evidence           | 24 | Summarize the main findings including the strength of evidence for each main outcome; consider their relevance to key groups (e.g., healthcare providers, users, and policy makers).                     | 14                 |
| Limitations                   | 25 | Discuss limitations at study and outcome level (e.g., risk of bias), and at review-level (e.g., incomplete retrieval of identified research, reporting bias).                                            | 14-15              |
| Conclusions                   | 26 | Provide a general interpretation of the results in the context of other evidence, and implications for future research.                                                                                  | 14                 |
| <b>FUNDING</b>                |    |                                                                                                                                                                                                          |                    |
| Funding                       | 27 | Describe sources of funding for the systematic review and other support (e.g., supply of data); role of funders for the systematic review.                                                               | 15                 |

From: Moher D, Liberati A, Tetzlaff J, Altman DG, The PRISMA Group (2009). Preferred Reporting Items for Systematic Reviews and Meta-Analyses: The PRISMA Statement. PLoS Med 6(7): e1000097. doi:10.1371/journal.pmed1000097

For more information, visit: [www.prisma-statement.org](http://www.prisma-statement.org).

Page 2 of 2

For peer review only - <http://bmjopen.bmj.com/site/about/guidelines.xhtml>

# BMJ Open

## What are the important design features of personal health records to improve medication adherence for patients with long term conditions? A systematic literature review.

|                                 |                                                                                                                                                                                                                                                                                                                                                                                     |
|---------------------------------|-------------------------------------------------------------------------------------------------------------------------------------------------------------------------------------------------------------------------------------------------------------------------------------------------------------------------------------------------------------------------------------|
| Journal:                        | <i>BMJ Open</i>                                                                                                                                                                                                                                                                                                                                                                     |
| Manuscript ID                   | bmjopen-2018-028628.R1                                                                                                                                                                                                                                                                                                                                                              |
| Article Type:                   | Original research                                                                                                                                                                                                                                                                                                                                                                   |
| Date Submitted by the Author:   | 02-Jul-2019                                                                                                                                                                                                                                                                                                                                                                         |
| Complete List of Authors:       | Andrikopoulou, Elisavet; University of Portsmouth Faculty of Technology, School of Computing;<br>Scott, Philip; University of Portsmouth Faculty of Technology, School of Computing<br>Herrera, Helena; University of Portsmouth Faculty of Science, School of Pharmacy and Biomedical Sciences<br>Good, Alice; University of Portsmouth Faculty of Technology, School of Computing |
| <b>Primary Subject Heading</b>: | Health informatics                                                                                                                                                                                                                                                                                                                                                                  |
| Secondary Subject Heading:      | Public health                                                                                                                                                                                                                                                                                                                                                                       |
| Keywords:                       | personal health record, medication adherence, medical informatics, systematic literature review, long-term conditions, PHR                                                                                                                                                                                                                                                          |
|                                 |                                                                                                                                                                                                                                                                                                                                                                                     |

SCHOLARONE™  
Manuscripts

1  
2  
3  
4  
5  
6  
7  
8  
9  
10  
11  
12  
13  
14  
15  
16  
17  
18  
19  
20  
21  
22  
23  
24  
25  
26  
27  
28  
29  
30  
31  
32  
33  
34  
35  
36  
37  
38  
39  
40  
41  
42  
43  
44  
45  
46  
47  
48  
49  
50  
51  
52  
53  
54  
55  
56  
57  
58  
59  
60

# What are the important design features of personal health records to improve medication adherence for patients with long term conditions? A systematic literature review.

Corresponding author:

Elisavet Andrikopoulou, MRes, BSc

+44 (0) 23 9284 6378

PhD Candidate

School of Computing, Faculty of Technology, University of Portsmouth

Buckingham Building, Lion Terrace, Portsmouth PO1 3HE

[elisavet.andrikopoulou@port.ac.uk](mailto:elisavet.andrikopoulou@port.ac.uk)

Dr Philip Scott

Reader, School of Computing, Faculty of Technology, University of Portsmouth

[philip.scott@port.ac.uk](mailto:philip.scott@port.ac.uk)

Dr Helena Herrera

Senior Lecturer, School of Pharmacy and Biomedical Sciences, Faculty of Science, University of Portsmouth

[helena.herrera@port.ac.uk](mailto:helena.herrera@port.ac.uk)

Dr Alice Good

Senior Lecturer, School of Computing, Faculty of Technology, University of Portsmouth

[alice.good@port.ac.uk](mailto:alice.good@port.ac.uk)

Literature review

Word Count: 3495

## KEYWORDS

Personal health record, medication adherence, medical informatics, systematic literature review, long-term conditions

## ABSTRACT

**Objectives:** This systematic literature review aims to identify important design features of the electronic personal health record (PHR) that may improve medication adherence in the adult population with long-term conditions.

**Data sources:** PubMed (including MEDLINE), CINAHL, Science Direct (including EMBASE), BioMed Central, ACM digital, Emerald Insight, Google Scholar and Research Gate.

**Methods:** Studies published between 1/1/2002 to 31/5/2018, in English were included if the participants were adults, with at least one long-term condition, able to self-administer their medication and were treated in primary care settings. The quality of evidence was assessed with the Grading of Recommendations Assessment, Development, and Evaluation (GRADE) system and the risk of bias was appraised using the Cochrane risk of bias tool.

**Results:** From a total of 27 studies that matched the inclusion criteria, 12 were excluded due to low quality of evidence, 10 were rated moderate and 5 were high quality. All the included studies had low sample size and limited follow-up duration. 13 of the included studies found that the use of a PHR has increased medication adherence. The identified design features are reminders, education, personalisation and tailoring, feedback and alerts, gamification, medication management, medical appointment management, diary and self-monitoring, health condition management, set goals, patient's blog and tethered. It was impossible to draw conclusions as to which feature is important to what group of patients and why. The most frequently identified conditions were HIV and diabetes. This review did not identify any papers with negative results. It was not possible to numerically aggregate the PHR effect due to high heterogeneity of the medication adherence measurement, study type, participants and PHRs used.

**Conclusion:** Although we found recurrent evidence that PHRs can improve medication adherence, there is little evidence to date to indicate which design features facilitate this process.

**Registration:** PROSPERO CRD42017060542

Literature review

## ARTICLE SUMMARY

### Strengths and limitations of this study

- This is a systematic literature review that follows the Preferred Reporting Items for Systematic Reviews and Meta-Analyses (PRISMA) guidelines;
- The protocol was published before conducting the study to avoid data-driven decisions;
- A comprehensive literature search was carried out using eight major research paper databases, hand-searching and snowballing;
- All included studies were quality assessed using well-cited tools and documentation;
- A study limitation is that only studies published in English language were included

## INTRODUCTION

A 2018 healthcare consultant report calls for focusing on healthcare value instead of increasing the size of the current systems to accommodate for the rising demand.[1] Healthcare expenditures were 16.5% of GDP in USA and 11.5% of GDP for Switzerland in 2016.[1] NHS policy anticipates that increasing usage of health apps by patients will reduce demand on healthcare services.[2] *The NHS Long Term Plan*[3] policy document focuses on increasing personalisation in healthcare to improve quality of life and public health and aspires that information and communication technology (ICT) can reduce healthcare costs and improve healthcare outcomes over the next five years. This assertion, however, is not based upon scientific research, so the claimed benefits remain aspirational.

Currently, 74% of UK nationals older than 45 years old and almost all younger than 45 years old adults are using the internet nearly every day.[4] Based on the results of a 2017 US survey, roughly 40% of people living with a long-term condition were interested in using technology to assist them with medication, diagnosis, test results and managing their condition in their home environment.[5]

A form of ICT that could potentially benefit the patients and the healthcare services is the electronic personal health record (PHR). A PHR has been defined as: “online systems that include collections of patients’ healthcare and medical data, which utilise health informatics standards to enable patients to share, organize and manage these data according to their own views”. [6] Some of the claimed benefits of PHRs are the ability of PHR to improve patient outcomes, decrease care cost, allow patients the ability to self-manage their health, increase access to care especially in remote areas, empower patients and improve medication adherence.[7,8]

Medication adherence is a well-known challenge in healthcare,[9,10] and is related to a large number of factors such as side effects,[11] forgetfulness,[9] or effective self-management[12] and is affected by psychological factors and beliefs.[12] Medication adherence can be defined as “the extent to which a person’s behaviour towards their medication intake, corresponds with agreed recommendations from a health care provider”. [10] The World Health Organization (WHO) reported that in developed countries the medication adherence in patients with long-term conditions averages to fifty percent.[13] There is limited evidence whether PHRs actually improve medication adherence in chronically ill adults and no evidence synthesis as to which PHR design features are the most effective.

Polypharmacy refers to the simultaneous use of multiple medications and has associated with several poor health outcomes including medication adherence.[14–16] The effects of poor medication adherence are greater for people with polypharmacy,[16] This effect is greater since the

## Literature review

number of people with also with multiple long-term conditions is rising.[17] It is estimated that in UK, more than a third of patients with at least one long term illness do not adhere to their medication regime.[18]

A number of systems are currently in practice to use information and communication technologies (ICT) in order to store, manage and employ health and medical information. These ICTs are developed by coders who are implementing Human-Computer Interaction (HCI) principles.[19] The HCI discipline is used to improve the usability of the software to developers, especially in healthcare settings.[20] The NHS standards for PHRs[21] provide guidance on good practice for their development in England, but they do not provide enough details or guidelines on what design features should a PHR include nor evidence on how these features impact health outcomes.

Although a number of strategies and interventions have been identified to assist patients' medication adherence,[22,23] the number of approaches related to PHRs is surprisingly low. This is surprising since the limited success that traditional approaches to support adherence have had and that technical interventions may easily be combined with other categories of interventions such as behavioural to address and potentially improve medication adherence.[24]

This is the first systematic literature review that aims to identify important design features of the PHR that may improve medication adherence in the adult population with long-term conditions.

## Objectives

### Primary objective

Identify the important design features of the PHR that may have improved medication adherence in the adult population with long-term conditions.

### Secondary objectives

- Identify the PHR design features that may have improved medication adherence in the cases of:
  - polypharmacy;
  - specific long term condition groups;
- Identify if there was a correlation between participants' demographic characteristics, their usage of PHRs and their medication adherence;
- Explore how implementation factors affected medication adherence.

## METHODS

This systematic review is registered in the prospective register of systematic reviews (PROSPERO), registration number CRD42017060542 and follows the Preferred Reporting Items for Systematic Reviews and Meta-Analyses (PRISMA) guidelines.[25] The PRISMA checklist is provided as an additional file. The protocol for this study is published.[6]

### Study eligibility and selection

This review's inclusion and exclusion criteria are illustrated in Table 1 and are detailed in the published protocol.[6] As a result of the peer review process, we have decided to make a change to our published protocol and to exclude systematic literature reviews and include only primary studies.

There have been no deviations from the protocol.



## Literature review

Table 1 Summary of the PICOS elements included and excluded in the systematic review

|                        | Inclusion criteria                                                                                                                                                                                                                                                          | Exclusion criteria                                                                                                                                                                                                                                                                                                                                                       |
|------------------------|-----------------------------------------------------------------------------------------------------------------------------------------------------------------------------------------------------------------------------------------------------------------------------|--------------------------------------------------------------------------------------------------------------------------------------------------------------------------------------------------------------------------------------------------------------------------------------------------------------------------------------------------------------------------|
| Participants           | <p>Humans</p> <p>Adults with at least one long term condition</p> <p>Patients that can self-administer their medication</p> <p>Patients that are able to communicate freely and able to self-manage their medication.</p> <p>Patients treated outside the hospital only</p> | <p>Animals</p> <p>Pregnant, cancer or terminally ill patients</p> <p>Adults with medically serious problems that are not classified as long term conditions</p> <p>Patients that require assistance with taking their medication</p> <p>Patients unable to communicate or unable to self-manage their medication.</p> <p>Inpatients or patients living in care homes</p> |
| Intervention           | Interventions of any type, intensity and frequency, that aim to investigate the effect of electronic PHRs in medication adherence, concordance, compliance or persistence.                                                                                                  | N/A                                                                                                                                                                                                                                                                                                                                                                      |
| Comparators            | Non-PHR                                                                                                                                                                                                                                                                     | No comparison has been made with no-PHR or with usual care                                                                                                                                                                                                                                                                                                               |
| Outcome                | Any outcome related to the effect of electronic PHRs in medication adherence, concordance, compliance or persistence.                                                                                                                                                       | N/A                                                                                                                                                                                                                                                                                                                                                                      |
| Study design/type      | Primary studies published in the last fifteen years, without any geographical restriction.                                                                                                                                                                                  | Abstract-only reports without any references, commercial studies, party political statements, general discussion papers, magazine or newspaper articles, withdrawn abstracts or articles, protocols of reviews or literature reviews                                                                                                                                     |
| Quality of the Studies | Studies with Moderate or High quality                                                                                                                                                                                                                                       | Studies with Low and very low quality.                                                                                                                                                                                                                                                                                                                                   |

## Literature search

Mendeley software[26] was used as the bibliographic software. One author (EA) scanned the titles and abstracts and excluded studies that clearly did not meet the inclusion criteria. Full-text versions of the remaining articles were obtained and screened by the same author, using the criteria listed on Table 1. All the excluded studies were listed with at least one reason for exclusion. In case of uncertainty, the author PS was advised and there was a discussion until an agreement was made.

## Literature review

The reference lists of the included studies were examined to identify additional relevant literature. A hand-search of JMIR Medical Informatics, BMC Medical Informatics and Decision Making and BMJ Open was conducted by EA to identify further literature, as they were the three most cited and most impactful journals in the search we had done.

The full search strategy can be found in supplementary file. The search dates are January 1st, 2002 to May 31st, 2018 and the search terms are:

( phr OR "personal health record" OR "patient portal") AND adult\* AND ( "chronic disease" OR "chronic illness" OR "chronic condition" OR "long term disease" OR "long term illness" OR "long term condition" ) AND ("medication compliance" OR "medication adherence" OR "medication concordance" OR "medication persistence")

## Data extraction and analysis

EA reviewed and extracted the all literature and the data in the predefined data extraction forms.[6] The data extraction forms were designed by PS and EA to collect all the necessary data, based on the National Institute for Health and Care Excellence (NICE) data extraction forms[27] and the research questions. The completed data extraction forms, the initial and complete narrative analysis of the generated data was performed by EA and face validated by PS,[6] who did not review the excluded literature.

## Quality assessment

The quality of all included studies was assessed by the first author (EA) and 25% of the included studies were assessed by the second author (PS). Cohen's Kappa (k) inter-rater reliability measure[28] was calculated. The Joanna Briggs Institute (JBI) critical appraisal questionnaires were used to implement the GRADE approach[29] of quality assessment of the included studies. The GRADE approach is proposed by the Cochrane Collaboration[30] and it favours the JBI critical appraisal tools.[31]

The final quality scores per paper (Table 2) were assigned based upon five factors: risk of bias,[32] inconsistency,[33] indirectness,[34] imprecision[35] and publication bias.[36] All the studies were graded based on their study type, for example RCTs and systematic literature reviews started as high quality studies. Using the GRADE categories we started from the highest possible score based on the study's study type, using the JBI questions to extract data per paper for the GRADE scoring, reducing the quality for each instance of the factors mentioned above.

## Patient and public involvement

PPI has already been involved in the design of this research. On 22 of June 2018, a PPI focus group with 8 participants took place at the University of Portsmouth. This group's suggestions are taken into consideration by the research team. The PPI group approved the focus of this review and provided guidelines for future research.

Literature review

## RESULTS

### Literature search results

Figure 1 illustrates the literature search and selection method, presenting explanations for the exclusion of studies. Once duplicates were removed, a total of 1787 original works were identified and 15 were finally included in the qualitative synthesis.

### Characteristics of included studies

This review includes studies conducted in the USA (n=7), in Switzerland (n=2), in Canada (n=1), UK (n=1), Germany (n=1), Italy & Czech Republic (n=1), New Zealand (n=1) and Spain (n=1). Most studies had included participants, which have at least one long term condition (n=9), diabetes (n= 4) and HIV (n=3). Studies were published in 2017 (n=4), 2014 (n=4), 2016 (n=3), 2015 (n=2), 2013 (n=1) and 2008 (n=1). The majority of the included studies (n = 13) reported a positive result in terms of the impact on medication adherence, with two studies found no difference.[37,38] No study identified negative results. Five out of five high quality studies and eight out of 10 moderate quality studies found positive results with medication adherence. The main study characteristics are illustrated in Table 2.

## Literature review

Table 2 Included Primary Studies Characteristics

| Study                         | Study type | Participants |            |            |                              | Intervention           | Control    |                     | Medication adherence assessment            | Long Term Condition               | Follow-up (months) | Medication adherence results | Quality  |
|-------------------------------|------------|--------------|------------|------------|------------------------------|------------------------|------------|---------------------|--------------------------------------------|-----------------------------------|--------------------|------------------------------|----------|
|                               |            | Number       | Mean Age   | Male %     | Education (>= high school %) |                        | Number     | Type of Care        |                                            |                                   |                    |                              |          |
| <b>Allam (2015)</b>           | RCT        | 155          | 57.96      | 54.1       | 76.1                         | ONESelf                | 40         | Usual care          | Prescription Opioid Misuse Index           | Rheumatoid arthritis              | 4                  | Positive                     | Moderate |
| <b>Chrischilles (2014)</b>    | RCT        | 1075         | 72.3       | 43.2       | 98.7                         | Iowa PHR               | 273        | Usual care          | Self-reported                              | At least one                      | 12                 | No difference                | Moderate |
| <b>Dabbs (2016)</b>           | RCT        | 201          | 62         | 55.2       | 94                           | Pocket PATH            | Not stated | Usual care          | Health Habits Survey                       | Lung transplant recipients (LTRs) | 12                 | Positive                     | High     |
| <b>Fioravanti (2015)</b>      | RCT        | 51           | Not stated | Not stated | Not stated                   | METABO system          | 25         | Usual care          | Self-reported                              | Diabetes (all types)              | 1                  | Positive                     | Moderate |
| <b>Glaser (2017)</b>          | RCT        | 221          | Not stated | 58.4       | 72                           | PACE                   | Not stated | Usual care          | Lab results                                | At least one                      | 9                  | Positive                     | High     |
| <b>Glasgow (2012)</b>         | RCT        | 332          | 61.4       | 95         | 86                           | My Path to Health Life | Not stated | Enhanced Usual care | Hill-Bone scale                            | Diabetes type 2                   | 12                 | No difference                | Moderate |
| <b>Grant (2008)</b>           | RCT        | 244          | Not stated | 51         | Not stated                   | DM PHR                 | 118        | Usual care          | Medication initiation or dosage adjustment | Diabetes type 2                   | 12                 | Positive                     | High     |
| <b>Lakshminarayana (2017)</b> | RCT        | 201          | 60.3       | 60.7       |                              | Parkinson's Tracker    | 90         | Usual care          | MMAS-8                                     | Parkinson's disease (PD)          | 4                  | Positive                     | Moderate |

Literature review

|                           |              |     |      |      |            |            |            |                 |                                                               |                         |     |          |          |
|---------------------------|--------------|-----|------|------|------------|------------|------------|-----------------|---------------------------------------------------------------|-------------------------|-----|----------|----------|
| <b>Luque (2012)</b>       | RCT          | 29  | 48   | 55   | 69         | MyMedical  | n/a        | Usual care      | Self-reported                                                 | HIV                     | 2   | Positive | Moderate |
| <b>Mira (2014)</b>        | RCT          | 99  | 71.9 | 55.5 | Not stated | ALICE      | 48         | Usual care      | MMAS-4                                                        | At least one            | 11  | Positive | Moderate |
| <b>Perera (2014)</b>      | RCT          | 28  | 46   | 93   | Not stated | Not named  | 11         | Usual care      | MARS, pharmacy dispensing records, and lab tests              | HIV                     | 3   | Positive | Moderate |
| <b>Riva (2014)</b>        | RCT          | 51  | 47.5 | 49   | 76.4       | ONESelf    | 24         | Usual care      | Prescription Medication Use and Perception of Risk Instrument | Chronic back pain (CBP) | 5   | Positive | High     |
| <b>Tang (2013)</b>        | RCT          | 415 | 53.7 | 60   | 94.3       | PHCP       | 213        | Usual care      | diabetes control                                              | Diabetes type 2         | 12  | Positive | High     |
| <b>Westergaard (2017)</b> | Qualitative  | 19  | 49.3 | 63   | 74         | mPeer2Peer | Not stated | Usual care      | Self-reported                                                 | HIV                     | n/a | Positive | Moderate |
| <b>Zetl (2016)</b>        | Cohort Study | 669 | 38.4 | 29   | 28         | BETAPATH   | 330        | Paper based PDA | Number of injections per study interval.                      | Multiple sclerosis (MS) | 24  | Positive | Moderate |

## Literature review

**Primary objective**

Table 3 presents the PHR design features that were identified in the literature and are the generated themes of this literature review. The definitions of the PHR design features derive from commercial PHRs that are implementing them or the wider literature regarding PHRs and personal experience, since there are no International Standards Organization (ISO) standards or universally accepted terminology.

Table 3 PHR design features

| Feature                               | Definition                                                                                                                                                                                                                         | Medication adherence results by study |               |
|---------------------------------------|------------------------------------------------------------------------------------------------------------------------------------------------------------------------------------------------------------------------------------|---------------------------------------|---------------|
|                                       |                                                                                                                                                                                                                                    | Positive                              | No difference |
| <b>Reminder</b>                       | Reminders to take medication or to reorder their prescriptions, agnostic to the patient's chronic condition, demographics or any other external factor.                                                                            | 11                                    | 1             |
| <b>Education</b>                      | Includes smaller features, like search bars and views, which can improve the user's health literacy and understanding of their condition.                                                                                          | 3                                     | 2             |
| <b>Personalisation and tailoring</b>  | The personalisation involves presenting a health message specific to the individual patient's condition and demographic characteristics, whilst tailoring involves developing a PHR based on the individual's characteristics.[39] | 8                                     | 1             |
| <b>Feedback and alerts</b>            | Medical emergency alerts in the form of a press button alert or SMS, such as the ones a user may find in the MyALERT PHR.[40]                                                                                                      | 10                                    | 2             |
| <b>Gamification</b>                   | An umbrella term that includes the use of game design characteristics in non-game contexts.[41]                                                                                                                                    | 4                                     | 1             |
| <b>Medication management</b>          | Includes all the features that a chronically ill patient may need to conform to everyday life.[42]                                                                                                                                 | 10                                    | 2             |
| <b>Medical appointment management</b> | Medically related appointment tracking, re-scheduling and arrangement.[43]                                                                                                                                                         | 2                                     | -             |
| <b>Diary and self-monitoring</b>      | A combination of features related to health or medication intake monitoring.[44]                                                                                                                                                   | 8                                     | 2             |
| <b>Health condition management</b>    | Includes all the lab and medical tests results and integration of existing clinical data.[39]                                                                                                                                      | 3                                     | 1             |
| <b>Set goals</b>                      | Includes all the elements that are necessary for setting and managing goals.                                                                                                                                                       | 2                                     | 1             |
| <b>Patient's blog</b>                 | Includes sharing in social media or blogging regarding health.[45]                                                                                                                                                                 | 1                                     | -             |
| <b>Tethered</b>                       | Are the PHRs which are connected with an electronic health record (EHR).[46]                                                                                                                                                       | 2                                     | -             |

All the PHR design features, which are constitute the themes derived from our thematic analysis,[47] are interlinked and overlap. NVivo 11 was used to cluster our codes into potentially more comprehensive themes. The initial themes were clustered together based on coding similarity, which means that if there were coding many of the same included studies, they then were clustered together.

## Literature review

- reminder and medical appointment management (used in 2 studies)
- tethered (used in 2 studies)
- diary and self-monitoring (used in 10 studies)
- feedback and alerts and health condition management (used in 4 studies)
- medication management and patients blog (used in 1 studies)
- personalisation & tailoring, gamification, education, set goals (used in 10 studies)

## Secondary objectives

PHR design features that improve medication adherence in case of polypharmacy  
 Even though multiple papers are including polypharmacy or multi-morbidity factors about their participants, they do not explore whether there is a correlation or an association between polypharmacy and the PHR usage or medication adherence improvement or not. There is a trend that the more medications a person uses the less a reminder helps, but this is not a conclusion directly supported by the data, but an argument emerging from multiple studies.[38,45,48,49]

PHR design features that improve medication adherence for specific long term condition groups

This research identified a number of chronic conditions. However, only diabetes and HIV can be used to analyse the impact that the PHR design features are having in medication adherence, since the rest of the conditions are included in just one study.

### *HIV*

Three studies have been included that discuss how the use of PHRs affect medication adherence of adults with HIV.[49–51] All three studies produced positive results, having a very small (less than 50) number of participants that are also predominantly male and younger than 50 years old. Two studies are RCTs,[50,51] having follow-up duration of 2 to 3 months and the other one is a qualitative study[49] without any follow-up. All three studies include the personalisation and tailoring design feature, two of the studies use reminders, one study uses feedback and alerts and health condition management and one other study uses diary and self-monitoring design feature.

### *Diabetes*

Four studies have been included that discuss how the use of PHRs affect medication adherence of adults with diabetes.[37,52–54] All studies found positive results regarding medication adherence, apart from Glasgow *et al.*[37] Three studies used diary and self-monitoring[37,52,53] or personalisation and tailoring,[37,52–54] three studies used education and set goals[37,52,53] or gamification[37,52,54] and one[53] used feedback and alerts and health condition management PHR design features. The studies' follow-up duration was 12 months apart from Fioravanti *et al.*[52] which was 1 month.

Association between participants' demographic characteristics, their usage of PHRs and their medication adherence

Data regarding patients' demographics and medication adherence were collected and analysed. Only two[50,55] of the 15 studies provide a detailed description of the participants' ethnicity. Two studies[55,56] are also providing data regarding the technology literacy of the participants and two other studies[37,50] provide data for the health literacy of the participants.

Twelve of the 15 studies provided age group details, which illustrate that the younger the participants, the more positive results regarding medication adherence were identified. This could

## Literature review

1  
2  
3 be due to the presumed technological literacy of younger generations, however it was impossible to  
4 account for this confounding factor, since no data were supplied. Also the lower the number of  
5 participants in an experimental study (less than 251), the higher the impact of PHR in medication  
6 adherence. This could arguably illustrate a case of confirmation bias, meaning that the researcher  
7 stopped recruitment when the hypothesis was verified. It could also mean that some of these results  
8 are less accurate, due to lower number of participants, since there is uncertainty towards the validity  
9 of the results derived from RCTs with less than 100 participants.[57]  
10  
11

### How implementation factors affect the outcomes and heterogeneity

12 Heterogeneity has been found in the included studies regarding the study location, the included  
13 long-term conditions and the medication adherence measurement method. Although, the included  
14 study types were also heterogenic (Table 2), this does not seem to affect the general trend that the  
15 use of PHR has a positive impact in medication adherence. Heterogeneity has also been identified in  
16 participants' demographics and confounding factors (Table 2).  
17  
18  
19

20 Although expected otherwise, the duration of the follow-up in RCT studies does not seem to affect  
21 the outcomes, since the majority of the included RCTs produced positive results. There is however  
22 and indication that three out of four RCT studies that did not produce positive results had a 12  
23 months follow-up. This observation is in-line with the general idea of the field being new and there  
24 are no global standards that dictate the design of PHRs. Another interesting fact is that the studies  
25 that were either observational or literature reviews produced statistically more positive results than  
26 the RCTs.  
27  
28  
29

### Quality assessment

30 The inter-rater reliability for quality assessment was calculated to  $k=0.88$ , which indicates high  
31 reliability of the quality assessment. Overall, 27 studies matched our inclusion criteria. 12 of these  
32 studies were excluded due to low quality of evidence, five were graded as high quality of evidence  
33 and the remaining 10 as moderate quality of evidence. The detailed quality assessment table based  
34 on the GRADE approach can be found in the additional file.  
35  
36  
37

38 Figure 2 illustrates the overall risk of bias for this study. The details behind this diagram and the  
39 overall quality assessment are provided as additional file.  
40  
41  
42  
43

## DISCUSSION

44 In this section we reflect upon the principal themes and overall conclusions from the literature  
45 review. A first impression after the initial data analysis was that too few studies actually mentioned  
46 the term PHR. In the majority of the cases we had to critique the intervention of the inclusion  
47 criteria based on our PHR definition. This systematic review included 15 primary studies of multiple  
48 study types and identified 12 different PHR design features. Although 12 different PHR design  
49 features were identified, there are no specific guidelines that can be derived from the results.  
50 Overall, 87% ( $n=13$ ) of the included studies found that the use of a PHR has increased medication  
51 adherence. Based on the number of studies that identified positive results, the fact that 8 out of the  
52 10 high quality studies identified positive results and that no study indicated a negative effect on  
53 medication adherence, we conclude that there is a reasonable indication that PHRs can have an  
54 overall positive effect on medication adherence. However, due to the high heterogeneity in  
55 medication adherence measurements, reporting styles and study types, we were unable to group  
56  
57  
58  
59  
60



## Literature review

and quantify the results in study level. It is of course possible that the absence of negative results is due to publication bias.

Reminders, feedback and alerts and medication management are the most commonly used PHR design feature, since all studies include at least one of the three. These findings are also consistent with the existing literature, which identifies reminders, and medication management as the most commonly used features that assist patients with their medication intake.[58–62] The design features with the most positive effect for patients' medication adherence were patient's blog, tethered and medical appointment management. This could arguably be since these features are also the least used, since the medication appointment management has the most positive results in the relevant literature.[59–65] The generated clusters paint a similar picture. The cluster that produces the best results is personalisation & tailoring, gamification, education and set goals (92% of studies in this cluster produce positive results) and reminder and medical appointment management (80% of studies in this cluster produce positive results).

Two groups of patients have been identified in this literature review for further analysis, to find which of the PHR design features work best for them. The most positive results for diabetic participants were identified by three studies[52–54] that used PHRs. Furthermore, for participants with HIV, three studies were identified producing positive results[49–51] that used at least personalisation and tailoring design feature and reminders. Mixed associations were found between patients demographics, their PHR usage and medication adherence. Taking into account the median age confounding factor of the participants, then it is apparent that the younger the participants, the more positive results identified. This is also supported in the general academic literature that suggest that technological literacy levels are higher in younger adult population.[66,67]

Furthermore, the less participants a study included the more positive the results appeared to be. This in fact may cause problems in the quality of evidence for the included studies and this literature review; hence our suggestion to interpret the results with caution. There is a proven link between the sample size of an RCT and the statistical significance of its result.[68] According to Faber *et al*,[69] the small sample size might increase the chance of a false-positive and the study might not reach to a evident conclusion.

The 'other' bias category has the highest risk of bias of all the assessed risks, which is in line with the key findings of this and other related studies,[70] resulting in a probable overestimation of PHR effect on medication adherence and potentially echoing a form of recall bias.[71] Although some degree of bias is considered unavoidable, the high risk of bias identified in the included studies and the generally moderate quality of evidence presented in them also reflects the uncertainty on this field and the need for further research on both PHRs and medication adherence. A PHR design feature that is not mentioned in the included literature is security. This might be happening due to the inclusion/exclusion criteria of this systematic review, since the security of the data does not seem to affect patients' medication adherence. Another limitation is that we included English papers published in the last 15 years, due to time and cost constraints. Screening of the studies and data collection was conducted by EA and only face validated by PS, therefore this is also a significant limitation. Furthermore, the small number of participants in the studies is commonly known to overestimate the effect of an intervention, fact which is noticeable in the included studies.

## FUNDING STATEMENT

This research received no specific grant from any funding agency in the public, commercial or not-for-profit sectors.

Literature review

## COMPETING INTERESTS STATEMENT

None declared.

## DATA SHARING STATEMENT

All data relevant to the study are included in the article or uploaded as supplementary information

## PATIENT CONSENT

Not required.

## AUTHOR CONTRIBUTION

EA drafted the manuscript, and is the guarantor of the review. PJS revised the manuscript multiple times for methodological and intellectual content. HH revised the manuscript twice for methodological, conceptual and intellectual content from a pharmaceuticals' perspective. AG also revised the manuscript for methodological, conceptual and intellectual content and also contributed in the abstract design. The final version of the manuscript was approved by all three authors.

## ACKNOWLEDGEMENTS

The authors would like to acknowledge Dr Nicola Barnes and Dr Penny Ross, for providing academic insight and support. The authors would also like to acknowledge the participants of the PPI group for their insightful feedback and time.

## REFERENCES

- 1 Deloitte. 2018 Global health care outlook: The evolution of smart health care. 2018. <https://www2.deloitte.com/content/dam/Deloitte/global/Documents/Life-Sciences-Health-Care/gx-lshc-hc-outlook-2018.pdf> (accessed 22 Nov 2018).
- 2 National Information Board, Department of Health. Personalised health and care 2020: a framework for action. 2014. <https://www.gov.uk/government/publications/personalised-health-and-care-2020/using-data-and-technology-to-transform-outcomes-for-patients-and-citizens> (accessed 11 Feb 2018).
- 3 NHS. The NHS Long Term Plan. 2019. [www.longtermplan.nhs.uk](http://www.longtermplan.nhs.uk) (accessed 2 May 2019).
- 4 Office for National Statistics. Internet users in the UK: Statistical Bulletin. 2016. <https://www.ons.gov.uk/businessindustryandtrade/itandinternetindustry/bulletins/internetu>

## Literature review

- 1  
2  
3 sers/2016 (accessed 25 Sep 2018).  
4
- 5 Deloitte. 2017 Global Health Care Sector Outlook.  
6 2017.<https://www2.deloitte.com/content/dam/Deloitte/global/Documents/Life-Sciences-Health-Care/gx-lshc-2015-health-care-outlook-infographic.pdf> (accessed 10 Nov 2018).  
7  
8
- 9 6 Andrikopoulou E, Scott PJ, Herrera H. Important Design Features of Personal Health Records  
10 to Improve Medication Adherence for Patients with Long-Term Conditions: Protocol for a  
11 Systematic Literature Review. *JMIR Res Protoc* 2018;**7**:e159. doi:10.2196/resprot.9778  
12
- 13 7 Price M, Bellwood P, Kitson N, *et al*. Conditions potentially sensitive to a personal health  
14 record (PHR) intervention, a systematic review. *BMC Med Inf Decis Mak* 2015;**15**:32.  
15 doi:10.1186/s12911-015-0159-1  
16
- 17 8 Institute of Medicine. *Health IT and Patient Safety*. Washington, D.C.: : National Academies  
18 Press 2012. doi:10.17226/13269  
19
- 20 9 Moorhead P, Zavala A, Kim Y, *et al*. Efficacy and safety of a medication dose reminder feature  
21 in a digital health offering with the use of sensor-enabled medicines. *J Am Pharm Assoc*  
22 (2003) 2017;**57**:155-161.e1. doi:10.1016/j.japh.2016.12.067  
23
- 24 10 De Geest S, Sabaté E. Adherence to long-term therapies: evidence for action. *Eur J Cardiovasc*  
25 *Nurs* 2003;**2**:323. doi:10.1016/S1474-5151(03)00091-4  
26
- 27 11 Rapoff MA. *Adherence to Pediatric Medical Regimens*. Boston, MA: : Springer US 2010.  
28 doi:10.1007/978-1-4419-0570-3  
29
- 30 12 McDonald HP, Garg AX, Haynes RB. Interventions to enhance patient adherence to  
31 medication prescriptions: scientific review. *JAMA* 2002;**288**:2868–79.  
32 doi:10.1001/jama.288.22.2868  
33
- 34 13 Who. Defining adherence. 2003;**1**–  
35 28.[www.who.int/chp/knowledge/publications/adherence\\_report/en/](http://www.who.int/chp/knowledge/publications/adherence_report/en/)? (accessed 25 Oct  
36 2017).  
37
- 38 14 Clyne B, Bradley MC, Hughes C, *et al*. Electronic prescribing and other forms of technology to  
39 reduce inappropriate medication use and polypharmacy in older people: a review of current  
40 evidence. *Clin Geriatr Med* 2012;**28**:301–22. doi:10.1016/j.cger.2012.01.009  
41
- 42 15 Kvarnström K, Airaksinen M, Liira H. Barriers and facilitators to medication adherence: a  
43 qualitative study with general practitioners. *BMJ Open* 2018;**8**:e015332.  
44 doi:10.1136/bmjopen-2016-015332  
45
- 46 16 Duerden M, Avery T, Payne R. Polypharmacy and medicines optimisation Making it safe and  
47 sound. 2013.  
48 <http://citeseerx.ist.psu.edu/viewdoc/download?doi=10.1.1.734.5288&rep=rep1&type=pdf>  
49 (accessed 25 Nov 2017).  
50
- 51 17 DH/Long Term Conditions. Long Term Conditions Compendium of Information: Third Edition.  
52 2012.  
53 [https://assets.publishing.service.gov.uk/government/uploads/system/uploads/attachment\\_d  
54 ata/file/216528/dh\\_134486.pdf](https://assets.publishing.service.gov.uk/government/uploads/system/uploads/attachment_data/file/216528/dh_134486.pdf) (accessed 1 Mar 2019).  
55
- 56 18 Royal Pharmaceutical Society. Medicines adherence.  
57 2015.<https://www.rpharms.com/resources/quick-reference-guides/medicines-adherence>  
58 (accessed 24 Oct 2017).  
59
- 60 19 Poole ES. HCI and mobile health interventions. *Transl Behav Med* 2013;**3**:402–5.

## Literature review

- 1  
2  
3 doi:10.1007/s13142-013-0214-3  
4  
5 20 Poole ES. HCI and mobile health interventions: How human-computer interaction can  
6 contribute to successful mobile health interventions. *Transl Behav Med* 2013;**3**:402–5.  
7 doi:10.1007/s13142-013-0214-3  
8  
9 21 NHS Digital. Standards for commissioning or developing Personal Health Records.  
10 2018.[https://digital.nhs.uk/services/personal-health-records-adoption-service/personal-](https://digital.nhs.uk/services/personal-health-records-adoption-service/personal-health-records-adoption-toolkit/developing-a-personal-health-record/standards-for-developing-personal-health-records)  
11 [health-records-adoption-toolkit/developing-a-personal-health-record/standards-for-](https://digital.nhs.uk/services/personal-health-records-adoption-service/personal-health-records-adoption-toolkit/developing-a-personal-health-record/standards-for-developing-personal-health-records)  
12 [developing-personal-health-records](https://digital.nhs.uk/services/personal-health-records-adoption-service/personal-health-records-adoption-toolkit/developing-a-personal-health-record/standards-for-developing-personal-health-records) (accessed 1 Feb 2019).  
13  
14 22 Chisholm MA. Enhancing transplant patients' adherence to medication therapy. *Clin*  
15 *Transplant* 2002;**16**:30–8. doi:10.1034/j.1399-0012.2002.00104.x  
16  
17 23 Nunes V, Neilson J, O'Flynn N, *et al*. Clinical Guidelines and Evidence Review for Medicines  
18 Adherence : involving patients in decisions about prescribed medicines and supporting  
19 adherence Full Guideline. *Natl Collab Cent Prim Care* 2009;**1**–  
20 364.<https://www.ncbi.nlm.nih.gov/books/NBK55440/> (accessed 4 Oct 2017).  
21  
22 24 Chisholm-Burns MA, Spivey CA. Pharmacoadherence: a new term for a significant problem.  
23 *Am J Health Syst Pharm* 2008;**65**:661–7. doi:10.2146/ajhp070372  
24  
25 25 Knobloch K, Yoon U, Vogt PM. Preferred reporting items for systematic reviews and meta-  
26 analyses (PRISMA) statement and publication bias. *J Craniomaxillofac Surg* 2011;**39**:91–2.  
27 doi:10.1016/j.jcms.2010.11.001  
28  
29 26 Elsevier. Mendeley. 2019. <https://www.mendeley.com> (accessed 28 Jun 2019).  
30  
31 27 The British Psychological Society. Data extraction forms for qualitative studies. In: *A NICE-SCIE*  
32 *Guideline on Supporting People With Dementia and Their Carers in Health and Social Care*.  
33 The British Psychological Society and Gaskell 2006. 66–8. doi:978-1-85433-451-0  
34  
35 28 Friedman CP, Wyatt J. *Evaluation Methods in Biomedical Informatics*. New York: : Springer-  
36 Verlag 2006. doi:10.1007/0-387-30677-3  
37  
38 29 Joanna Briggs Institute. Critical Appraisal Tools.  
39 2005;**6**:2006.<http://joannabriggs.org/research/critical-appraisal-tools.html> (accessed 4 Sep  
40 2017).  
41  
42 30 Higgins J, Green S, editors. *Cochrane Handbook for Systematic Reviews of Interventions*.  
43 Version 5. The Cochrane Collaboration 2011. [www.handbook.cochrane.org](http://www.handbook.cochrane.org) (accessed 13 Nov  
44 2017).  
45  
46 31 Cochrane Training. GRADE approach. 2018.<https://training.cochrane.org/grade-approach>  
47 (accessed 4 Oct 2018).  
48  
49 32 Guyatt GH, Oxman AD, Vist G, *et al*. GRADE guidelines: 4. Rating the quality of evidence -  
50 Study limitations (risk of bias). *J Clin Epidemiol* 2011;**64**:407–15.  
51 doi:10.1016/j.jclinepi.2010.07.017  
52  
53 33 Guyatt GH, Oxman AD, Kunz R, *et al*. GRADE guidelines: 7. Rating the quality of evidence—  
54 inconsistency. *J Clin Epidemiol* 2011;**64**:1294–302. doi:10.1016/j.jclinepi.2011.03.017  
55  
56 34 Guyatt GH, Oxman AD, Kunz R, *et al*. GRADE guidelines: 8. Rating the quality of evidence -  
57 Indirectness. *J Clin Epidemiol* 2011;**64**:1303–10. doi:10.1016/j.jclinepi.2011.04.014  
58  
59 35 Guyatt GH, Oxman AD, Kunz R, *et al*. GRADE guidelines 6. Rating the quality of evidence--  
60 imprecision. *J Clin Epidemiol* 2011;**64**:1283–93. doi:10.1016/j.jclinepi.2011.01.012

## Literature review

- 1  
2  
3 36 Guyatt GH, Oxman AD, Montori V, *et al.* GRADE guidelines: 5. Rating the quality of evidence -  
4 Publication bias. *J Clin Epidemiol* 2011;**64**:1277–82. doi:10.1016/j.jclinepi.2011.01.011  
5
- 6 37 Glasgow RE, Kurz D, King D, *et al.* Twelve-month outcomes of an Internet-based diabetes self-  
7 management support program. *Patient Educ Couns* 2012;**87**:81–92.  
8 doi:10.1016/j.pec.2011.07.024  
9
- 10 38 Chrischilles EA, Hourcade JP, Doucette W, *et al.* Personal health records: a randomized trial of  
11 effects on elder medication safety. *J Am Med Inform Assoc* 2014;**21**:679–86.  
12 doi:10.1136/amiajnl-2013-002284  
13
- 14 39 Househ MS, Borycki EM, Rohrer WM, *et al.* Developing a framework for meaningful use of  
15 personal health records (PHRs). *Heal Policy Technol* 2014;**3**:272–80.  
16 doi:10.1016/j.hlpt.2014.08.009  
17
- 18 40 ALERT Life Sciences Computing. MyALERT® - Personal Health Record. 2010.[http://www.alert-](http://www.alert-online.com/myalert)  
19 [online.com/myalert](http://www.alert-online.com/myalert) (accessed 26 Oct 2017).  
20
- 21 41 Deterding S, Sicart M, Nacke L, *et al.* Gamification. using game-design elements in non-  
22 gaming contexts. In: *Proceedings of the 2011 annual conference extended abstracts on*  
23 *Human factors in computing systems - CHI EA '11*. New York, New York, USA: : ACM Press  
24 2011. 2425. doi:10.1145/1979742.1979575  
25
- 26 42 Dalgaard L, Grönvall E, Verdezoto N. Accounting for Medication Particularities: Designing for  
27 Everyday Medication Management. In: *Proceedings of the ICTs for improving Patients*  
28 *Rehabilitation Research Techniques*. ICST, Brussels, Belgium, Belgium: : IEEE 2013. 137–44.  
29 doi:10.4108/icst.pervasivehealth.2013.252058  
30
- 31 43 Wagner PJ, Dias J, Howard S, *et al.* Personal health records and hypertension control: a  
32 randomized trial. *J Am Med Inform Assoc* 2012;**19**:626–34. doi:10.1136/amiajnl-2011-000349  
33
- 34 44 Zetl UK, Bauer-Steinhusen U, Glaser T, *et al.* Evaluation of an electronic diary for  
35 improvement of adherence to interferon beta-1b in patients with multiple sclerosis: design  
36 and baseline results of an observational cohort study. *BMC Neurol* 2013;**13**:117.  
37 doi:10.1186/1471-2377-13-117  
38
- 39 45 Allam A, Kostova Z, Nakamoto K, *et al.* The effect of social support features and gamification  
40 on a web-based intervention for rheumatoid arthritis patients: Randomized controlled trial. *J*  
41 *Med Internet Res* 2015;**17**:e14. doi:10.2196/jmir.3510  
42
- 43 46 Vydra TP, Cuaresma E, Kretovics M, *et al.* Diffusion and Use of Tethered Personal Health  
44 Records in Primary Care. *Perspect Heal Inf Manag*  
45 2015;**12**:1c.<http://www.pubmedcentral.nih.gov/articlerender.fcgi?artid=PMC4696089>  
46
- 47 47 Braun V, Clarke V. Using thematic analysis in psychology. *Qual Res Psychol* 2006;**3**:77–  
48 101.<http://eprints.uwe.ac.uk/11735>  
49
- 50 48 Glaser E, Richard C, Lussier M-T. The impact of a patient web communication intervention on  
51 reaching treatment suggested guidelines for chronic diseases: A randomized controlled trial.  
52 *Patient Educ Couns* 2017;**100**:2062–70. doi:10.1016/j.pec.2017.05.022  
53
- 54 49 Westergaard RP, Genz A, Panico K, *et al.* Acceptability of a mobile health intervention to  
55 enhance HIV care coordination for patients with substance use disorders. *Addict Sci Clin Pract*  
56 2017;**12**:11. doi:10.1186/s13722-017-0076-y  
57
- 58 50 Luque AE, Corales R, Fowler RJ, *et al.* Bridging the digital divide in HIV care: a pilot study of an  
59 iPod personal health record. *J Int Assoc Provid AIDS Care* 2012;**12**:117–21.  
60

## Literature review

- 1  
2  
3 doi:10.1177/1545109712457712  
4
- 5 51 Perera AI, Thomas MG, Moore JO, *et al.* Effect of a Smartphone Application Incorporating  
6 Personalized Health-Related Imagery on Adherence to Antiretroviral Therapy: A Randomized  
7 Clinical Trial. *AIDS Patient Care STDS* 2014;**28**:579–86. doi:10.1089/apc.2014.0156  
8
- 9 52 Fioravanti A, Fico G, Salvi D, *et al.* Automatic messaging for improving patients engagement in  
10 diabetes management: an exploratory study. *Med Biol Eng Comput* 2015;**53**:1285–94.  
11 doi:10.1007/s11517-014-1237-8  
12
- 13 53 Tang PC, A J, Bates DW, *et al.* Personal Health Records: Definitions, Benefits, and Strategies  
14 fro Overcoming Barriers to Adoption. *J Am Med Informatics Assoc* 2006;**13**:121–7.  
15 doi:10.1197/jamia.M2025.records  
16
- 17 54 Grant RW, Wald JS, Schnipper JL, *et al.* Practice-linked online personal health records for type  
18 2 diabetes mellitus: a randomized controlled trial. *Arch Intern Med.* 2008;**168**:1776–82.  
19 doi:168/16/1776 [pii]r10.1001/archinte.168.16.1776  
20
- 21 55 DeVito Dabbs A, Song MK, Myers BA, *et al.* A Randomized Controlled Trial of a Mobile Health  
22 Intervention to Promote Self-Management After Lung Transplantation. *Am J Transplant*  
23 2016;**16**:2172–80. doi:10.1111/ajt.13701  
24
- 25 56 Zettl UK, Bauer-Steinhusen U, Glaser T, *et al.* Adherence to Long-Term Interferon Beta-1b  
26 Injection Therapy in Patients with Multiple Sclerosis Using an Electronic Diary. *Adv Ther*  
27 2016;**33**:834–47. doi:10.1007/s12325-016-0325-6  
28
- 29 57 Spieth PM, Kubasch AS, Penzlin A isabel, *et al.* Randomized controlled trials - a matter of  
30 design. *Neuropsychiatr Dis Treat* 2016;**12**:1341–9. doi:10.2147/NDT.S101938  
31
- 32 58 Hayes TL, Cobbinah K, Dishongh T, *et al.* A study of medication-taking and unobtrusive,  
33 intelligent reminding. *Telemed J E Health* 2009;**15**:770–6. doi:10.1089/tmj.2009.0033  
34
- 35 59 Mistry N, Keepanasseril A, Wilczynski NL, *et al.* Technology-mediated interventions for  
36 enhancing medication adherence. *J Am Med Inform Assoc* 2015;**22**:e177-93.  
37 doi:10.1093/jamia/ocu047  
38
- 39 60 Harrison S, Stadler M, Ismail K, *et al.* Are patients with diabetes mellitus satisfied with  
40 technologies used to assist with diabetes management and coping?: A structured review.  
41 *Diabetes Technol Ther* 2014;**16**:771–83. doi:10.1089/dia.2014.0062  
42
- 43 61 McLean G, Murray E, Band R, *et al.* Interactive digital interventions to promote self-  
44 management in adults with asthma: systematic review and meta-analysis. *BMC Pulm Med*  
45 2016;**16**:83. doi:10.1186/s12890-016-0248-7  
46
- 47 62 Morton K, Dennison L, May C, *et al.* Using digital interventions for self-management of  
48 chronic physical health conditions: A meta-ethnography review of published studies. *Patient*  
49 *Educ Couns* 2017;**100**:616–35. doi:10.1016/j.pec.2016.10.019  
50
- 51 63 Dorr D, Bonner LM, Cohen AN, *et al.* Informatics systems to promote improved care for  
52 chronic illness: a literature review. *J Am Med Inform Assoc* 2007;**14**:156–63.  
53 doi:10.1197/jamia.M2255  
54
- 55 64 Park LG, Howie-Esquivel J, Dracup K. A quantitative systematic review of the efficacy of  
56 mobile phone interventions to improve medication adherence. *J Adv Nurs* 2014;**70**:1932–53.  
57 doi:10.1111/jan.12400  
58
- 59 65 Stephani V, Opoku D, Quentin W. A systematic review of randomized controlled trials of  
60 mHealth interventions against non-communicable diseases in developing countries. *BMC*

## Literature review

- 1  
2  
3  
4  
5  
6  
7  
8  
9  
10  
11  
12  
13  
14  
15  
16  
17  
18  
19  
20  
21  
22  
23  
24  
25  
26  
27  
28  
29  
30  
31  
32  
33  
34  
35  
36  
37  
38  
39  
40  
41  
42  
43  
44  
45  
46  
47  
48  
49  
50  
51  
52  
53  
54  
55  
56  
57  
58  
59  
60
- Public Health* 2016;**16**:572. doi:10.1186/s12889-016-3226-3
- 66 Bastion S. *The development of a valid and reliable measure of technological literacy for adults*. 2014. <https://kuscholarworks.ku.edu/handle/1808/18642>
- 67 Sharp LA. Collaborative Digital Literacy Practices among Adult Learners: Levels of Confidence and Perceptions of Importance. *Int J Instr* 2018;**11**:153–66. doi:10.12973/iji.2018.11111a
- 68 Walsh M, Srinathan SK, McAuley DF, *et al*. The statistical significance of randomized controlled trial results is frequently fragile: a case for a Fragility Index. *J Clin Epidemiol* 2014;**67**:622–8. doi:10.1016/j.jclinepi.2013.10.019
- 69 Faber J, Fonseca LM. How sample size influences research outcomes. *Dental Press J Orthod* 2014;**19**:27–9. doi:10.1590/2176-9451.19.4.027-029.ebo
- 70 Showell C. Barriers to the use of personal health records by patients: a structured review. *PeerJ* 2017;**5**:e3268. doi:10.7717/peerj.3268
- 71 Tsai K-T, Chen J-H, Wen C-J, *et al*. Medication adherence among geriatric outpatients prescribed multiple medications. *Am J Geriatr Pharmacother* 2012;**10**:61–8. doi:10.1016/j.amjopharm.2011.11.005

**FIGURE LEGENDS**

Figure 1 PRISMA literature search and selection method diagram

Figure 2 Overall risk of bias

1  
2  
3  
4  
5  
6  
7  
8  
9  
10  
11  
12  
13  
14  
15  
16  
17  
18  
19  
20  
21  
22  
23  
24  
25  
26  
27  
28  
29  
30  
31  
32  
33  
34  
35  
36  
37  
38  
39  
40  
41  
42  
43  
44  
45  
46  
47  
48  
49  
50  
51  
52  
53  
54  
55  
56  
57  
58  
59  
60

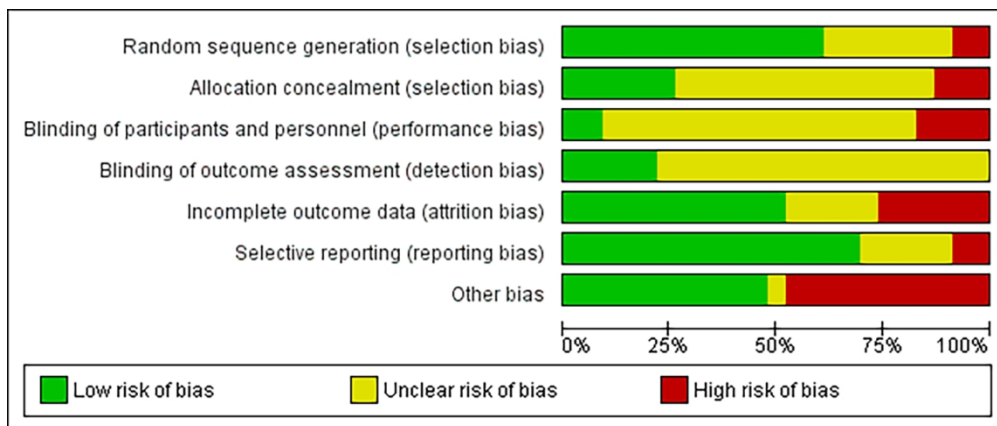

Risk of bias graph

160x67mm (300 x 300 DPI)



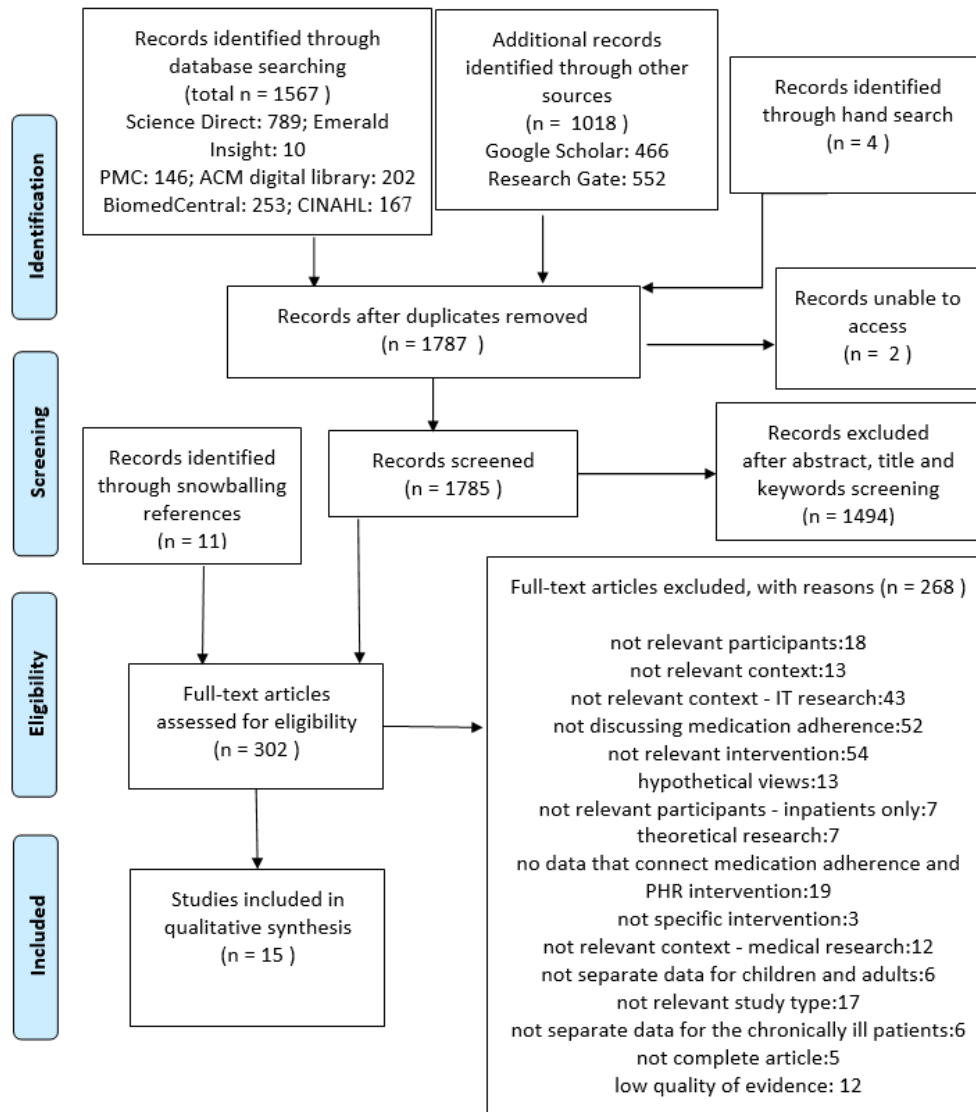

PRISMA literature search and selection method diagram

| Study                         | Study Type                          | Starting Point | Risk of Bias    | Inconsistency | Indirectness | Imprecision  | Publication bias | Quality of evidence |
|-------------------------------|-------------------------------------|----------------|-----------------|---------------|--------------|--------------|------------------|---------------------|
| Allam 2015                    | RCT                                 | high           | Unclear (-1)    | Unclear (-1)  | Unlikely     | Unclear (-1) | Unlikely         | Low                 |
| Chrischilles 2014             | RCT                                 | high           | Unclear (-1)    | Unlikely      | Unclear (-1) | High (-2)    | Unlikely         | Low                 |
| 1<br>2<br>Dalgaard 2013       | Case series                         | low            | High (-2)       | Unlikely      | Unlikely     | High (-2)    | Unlikely         | Very Low            |
| 3<br>4<br>Bravanti 2015       | RCT                                 | high           | Unclear (-1)    | Unlikely      | Unlikely     | Unclear (-1) | Unclear (-1)     | Moderate            |
| 5<br>6<br>Foreman 2012        | cohort study                        | moderate       | Unclear (-1)    | Unlikely      | Unlikely     | Unclear (-1) | Unlikely         | Low                 |
| 7<br>8<br>Glaser 2017         | RCT                                 | high           | No risk of bias | Unlikely      | Unlikely     | Unlikely     | Unlikely         | High                |
| 9<br>10<br>Glasgow 2012       | RCT                                 | high           | Unclear (-1)    | Unclear (-1)  | Unlikely     | Unclear (-1) | Unlikely         | Low                 |
| 11<br>12<br>Hou 2012          | cohort study                        | moderate       | Unclear (-1)    | High (-2)     | Unlikely     | Unlikely     | Unlikely         | Low                 |
| 13<br>14<br>Kaplan 2013       | systematic literature review        | high           | Unclear (-1)    | Unclear (-1)  | Unlikely     | Unclear (-1) | High (-2)        | Low                 |
| 15<br>16<br>Keith 2013        | cross sectional study               | low            | Unclear (-1)    | Unlikely      | Unlikely     | Unlikely     | Unlikely         | Low                 |
| 17<br>18<br>Lee 2014          | RCT                                 | high           | High (-2)       | High (-2)     | Unlikely     | Unlikely     | Unlikely         | Low                 |
| 19<br>20<br>Liu 2012          | RCT                                 | high           | Unclear (-1)    | Unlikely      | Unlikely     | Unlikely     | Unclear (-1)     | Moderate            |
| 21<br>22<br>McDermott 2013    | systematic literature review        | high           | Unclear (-1)    | Unlikely      | Unclear (-1) | Unlikely     | Unlikely         | Moderate            |
| 23<br>24<br>McGillicuddy 2013 | RCT                                 | high           | Unclear (-1)    | Unlikely      | Unclear (-1) | Unclear (-1) | Unclear (-1)     | Low                 |
| 25<br>26<br>McLean 2016       | systematic literature review with m | high           | Unclear (-1)    | Unlikely      | Unlikely     | Unlikely     | Unlikely         | High                |
| 27<br>28<br>Mistry 2015       | systematic literature review        | high           | Unclear (-1)    | Unlikely      | Unlikely     | Unlikely     | Unlikely         | High                |
| 29<br>30<br>Morton 2017       | systematic literature review        | high           | Unclear (-1)    | Unlikely      | Unlikely     | Unclear (-1) | Unlikely         | Moderate            |
| 31<br>32<br>Naslund 2017      | narrative literature review         | high           | High (-2)       | Unlikely      | Unlikely     | Unclear (-1) | Unclear (-1)     | Low                 |
| 33<br>34<br>Park 2014         | systematic literature review        | high           | Unclear (-1)    | Unlikely      | Unlikely     | Unlikely     | Unclear          | High                |
| 35<br>36<br>Pavel 2013        | RCT                                 | high           | Unclear (-1)    | Unlikely      | Unlikely     | High (-2)    | Unclear (-1)     | Low                 |
| 37<br>38<br>Riva 2014         | RCT                                 | high           | Unclear (-1)    | Unlikely      | Unlikely     | Unclear (-1) | Unlikely         | Moderate            |
| 39<br>40<br>Sing 2017         | quasi-experimental                  | moderate       | Unclear (-1)    | Unlikely      | Unlikely     | Unclear (-1) | Unlikely         | Low                 |
| 41<br>42<br>Stephani 2016     | systematic literature review        | high           | Unclear (-1)    | Unlikely      | Unlikely     | Unclear (-1) | Unclear          | Moderate            |
| 43<br>44<br>Tang 2013         | RCT                                 | high           | High (-2)       | Unlikely      | Unlikely     | Unlikely     | Unlikely         | Moderate            |
| 45<br>46<br>Westergaard 2017  | Qualitative study                   | moderate       | Unclear (-1)    | Unlikely      | Unclear (-1) | Unlikely     | Unlikely         | Low                 |
| 47<br>48<br>Yip 2014          | cohort study                        | moderate       | Unclear (-1)    | High (-2)     | Unlikely     | Unlikely     | Unlikely         | Low                 |
| 49<br>50<br>Zettl 2016        | cohort study                        | moderate       | Unclear (-1)    | Unlikely      | Unlikely     | Unclear (-1) | Unlikely         | Low                 |

1  
2  
3  
4  
5  
6  
7  
8  
9  
10  
11  
12  
13  
14  
15  
16  
17  
18  
19  
20  
21  
22  
23  
24  
25  
26  
27  
28  
29  
30  
31  
32  
33  
34  
35  
36  
37  
38  
39  
40  
41  
42  
43  
44  
45  
46  
47  
48  
49  
50  
51  
52  
53  
54  
55  
56  
57  
58  
59  
60

Random sequence generation (selection bias)

Allocation concealment (selection bias)

Blinding of participants and personnel (performance bias)

Blinding of outcome assessment (detection bias)

Incomplete outcome data (attrition bias)

Selective reporting (reporting bias)

Other bias

|                      |   |   |   |   |   |   |   |
|----------------------|---|---|---|---|---|---|---|
| Allam 2015           | + | + | ? | ? | - | + | - |
| Chrischilles 2014    | + | + | ? | ? | + | + | - |
| Dabbs 2016           | + | + | ? | + | + | + | + |
| Dorr 2007            | + | ? | ? | ? | ? | - | - |
| Fioravanti 2015      | ? | ? | ? | ? | + | + | - |
| Glaser 2017          | + | + | + | + | + | + | + |
| Glasgow 2012         | ? | ? | ? | ? | + | + | + |
| Grant 2008           | - | ? | ? | ? | + | + | + |
| Harrison 2014        | + | ? | ? | ? | ? | - | - |
| Rakshminarayana 2017 | + | + | - | + | - | + | - |
| Luque 2012           | ? | ? | ? | ? | - | + | - |
| McDermott 2013       | + | ? | ? | ? | ? | ? | + |
| McLean 2016          | + | ? | ? | ? | + | + | + |
| Mira 2014            | ? | ? | - | + | + | + | ? |
| Mistry 2015          | + | ? | ? | ? | + | ? | + |
| Morton 2017          | + | - | ? | ? | - | + | + |
| Park 2014            | ? | ? | ? | ? | - | ? | + |
| Perera 2014          | ? | ? | ? | ? | + | + | - |
| Riva 2014            | + | - | + | ? | + | + | - |
| Stephani 2016        | + | ? | ? | ? | - | ? | + |
| Tang 2013            | + | + | - | + | + | + | + |
| Westergaard 2017     | ? | ? | - | ? | ? | + | - |
| Zettl 2016           | - | - | ? | ? | ? | ? | - |

## Search strategy for PubMed central

("phr"[All Fields] OR "personal health record"[All Fields] OR "patient portal"[All Fields]) AND  
(adult[All Fields] OR adult/10[All Fields] OR adult/100[All Fields] OR adult/11[All Fields] OR  
adult/111[All Fields] OR adult/15[All Fields] OR adult/18[All Fields] OR adult/18,19,49/see[All Fields]  
OR adult/18yrs[All Fields] OR adult/2[All Fields] OR adult/20[All Fields] OR adult/21[All Fields] OR  
adult/26[All Fields] OR adult/285[All Fields] OR adult/2cm2[All Fields] OR adult/3[All Fields] OR  
adult/32[All Fields] OR adult/36[All Fields] OR adult/3647446[All Fields] OR adult/3l[All Fields] OR  
adult/4,7,11/should[All Fields] OR adult/40[All Fields] OR adult/400[All Fields] OR adult/44[All Fields]  
OR adult/5[All Fields] OR adult/50[All Fields] OR adult/56[All Fields] OR adult/6[All Fields] OR  
adult/60[All Fields] OR adult/7[All Fields] OR adult/70[All Fields] OR adult/74[All Fields] OR  
adult/8[All Fields] OR adult/9[All Fields] OR adult/97[All Fields] OR adult/97egfp[All Fields] OR  
adult/a[All Fields] OR adult/acquired[All Fields] OR adult/activational[All Fields] OR adult/acute[All  
Fields] OR adult/ad[All Fields] OR adult/ad3[All Fields] OR adult/adenovirus[All Fields] OR  
adult/adolescent[All Fields] OR adult/adolescent/school[All Fields] OR adult/adolescents[All Fields]  
OR adult/adult[All Fields] OR adult/adult/senior[All Fields] OR adult/adult/senior/mixed[All Fields]  
OR adult/adult's[All Fields] OR adult/aged[All Fields] OR adult/ageing[All Fields] OR adult/aging[All  
Fields] OR adult/allogenic[All Fields] OR adult/always[All Fields] OR adult/and[All Fields] OR  
adult/animal[All Fields] OR adult/anoxia[All Fields] OR adult/apex[All Fields] OR adult/arrhythmic[All  
Fields] OR adult/assets[All Fields] OR adult/attending[All Fields] OR adult/authority[All Fields] OR  
adult/base[All Fields] OR adult/bcg/dtp/ipv/opv/mmr/dt/td[All Fields] OR adult/benign[All Fields] OR  
adult/bioline[All Fields] OR adult/bovine[All Fields] OR adult/bovine/chromaffin[All Fields] OR  
adult/breeding[All Fields] OR adult/bregma[All Fields] OR adult/c[All Fields] OR adult/cancer[All  
Fields] OR adult/canine[All Fields] OR adult/caregiver[All Fields] OR adult/carer[All Fields] OR  
adult/carer/parent[All Fields] OR adult/cat[All Fields] OR adult/cat/chromaffin[All Fields] OR  
adult/caterpillar[All Fields] OR adult/caucasian[All Fields] OR adult/caucasian/male[All Fields] OR  
adult/cd[All Fields] OR adult/cell[All Fields] OR adult/cercarial[All Fields] OR adult/chick[All Fields] OR  
adult/chick/egg[All Fields] OR adult/child[All Fields] OR adult/child/both[All Fields] OR  
adult/child/infant[All Fields] OR adult/child/neonate[All Fields] OR adult/child/senior[All Fields] OR  
adult/childhood[All Fields] OR adult/childhoodsepb[All Fields] OR adult/children[All Fields] OR  
adult/choose[All Fields] OR adult/chronic[All Fields] OR adult/classic[All Fields] OR adult/classical[All  
Fields] OR adult/clutch[All Fields] OR adult/cm[All Fields] OR adult/coach[All Fields] OR  
adult/college[All Fields] OR adult/commercial[All Fields] OR adult/community[All Fields] OR  
adult/contact[All Fields] OR adult/contemporary[All Fields] OR adult/control[All Fields] OR  
adult/cord[All Fields] OR adult/cordadult[All Fields] OR adult/cordretic[All Fields] OR  
adult/criminal[All Fields] OR adult/criminality[All Fields] OR adult/culture[All Fields] OR  
adult/cysticerci[All Fields] OR adult/dark[All Fields] OR adult/dauer[All Fields] OR adult/day[All  
Fields] OR adult/ddlt[All Fields] OR adult/de[All Fields] OR adult/deaf[All Fields] OR adult/deaf/hh[All  
Fields] OR adult/definitive[All Fields] OR adult/deformity[All Fields] OR adult/dementia[All Fields] OR  
adult/developed[All Fields] OR adult/developmental[All Fields] OR adult/diabetic[All Fields] OR  
adult/differentiated[All Fields] OR adult/disc[All Fields] OR adult/diseased[All Fields] OR  
adult/disposable[All Fields] OR adult/domicile[All Fields] OR adult/dual[All Fields] OR  
adult/dyspraxia[All Fields] OR adult/e17[All Fields] OR adult/early[All Fields] OR adult/educators[All  
Fields] OR adult/ee[All Fields] OR adult/egg[All Fields] OR adult/eggs/larvae/pupae[All Fields] OR  
adult/elder[All Fields] OR adult/elderly[All Fields] OR adult/elite[All Fields] OR adult/embryo[All  
Fields] OR adult/embryonic[All Fields] OR adult/emergence[All Fields] OR adult/emerging[All Fields]  
OR adult/erythroid[All Fields] OR adult/established[All Fields] OR adult/etiology[All Fields] OR

1  
2  
3 adult/etiology/immunology[All Fields] OR adult/exp[All Fields] OR adult/experimenter[All Fields] OR  
4 adult/f[All Fields] OR adult/f1[All Fields] OR adult/family[All Fields] OR adult/father[All Fields] OR  
5 adult/father's[All Fields] OR adult/feline[All Fields] OR adult/female[All Fields] OR adult/fertile[All  
6 Fields] OR adult/fetal[All Fields] OR adult/fetus[All Fields] OR adult/ffq[All Fields] OR adult/final[All  
7 Fields] OR adult/first[All Fields] OR adult/fluent[All Fields] OR adult/foetal[All Fields] OR  
8 adult/friend[All Fields] OR adult/further[All Fields] OR adult/g[All Fields] OR adult/general[All Fields]  
9 OR adult/geriatric[All Fields] OR adult/gero[All Fields] OR adult/gerontologic[All Fields] OR  
10 adult/gerontological[All Fields] OR adult/gerontology[All Fields] OR adult/giobin[All Fields] OR  
11 adult/gp[All Fields] OR adult/group[All Fields] OR adult/guardian[All Fields] OR adult/ha[All Fields]  
12 OR adult/healthy[All Fields] OR adult/helper[All Fields] OR adult/heteronereis[All Fields] OR  
13 adult/hfd[All Fields] OR adult/high[All Fields] OR adult/higher[All Fields] OR adult/hiv[All Fields] OR  
14 adult/household[All Fields] OR adult/human[All Fields] OR adult/human/chromaffin[All Fields] OR  
15 adult/human/person[All Fields] OR adult/iis[All Fields] OR adult/immature[All Fields] OR  
16 adult/immature/gall[All Fields] OR adult/immediate[All Fields] OR adult/in[All Fields] OR  
17 adult/individual[All Fields] OR adult/infant[All Fields] OR adult/infantile[All Fields] OR  
18 adult/infected[All Fields] OR adult/informal[All Fields] OR adult/institutional[All Fields] OR  
19 adult/intact[All Fields] OR adult/internal[All Fields] OR adult/investigator[All Fields] OR  
20 adult/ischemia[All Fields] OR adult/junctional[All Fields] OR adult/junior[All Fields] OR adult/juv[All  
21 Fields] OR adult/juvenile[All Fields] OR adult/juvenile/family[All Fields] OR adult/juvenile/pups[All  
22 Fields] OR adult/juvenile/unknown[All Fields] OR adult/juveniles[All Fields] OR adult/kc[All Fields] OR  
23 adult/kitten[All Fields] OR adult/known[All Fields] OR adult/l[All Fields] OR adult/l3[All Fields] OR  
24 adult/l4[All Fields] OR adult/large[All Fields] OR adult/larger[All Fields] OR adult/larva[All Fields] OR  
25 adult/larvae[All Fields] OR adult/larval[All Fields] OR adult/last[All Fields] OR adult/late[All Fields] OR  
26 adult/later[All Fields] OR adult/ldlt[All Fields] OR adult/lifelong[All Fields] OR adult/lifetime[All  
27 Fields] OR adult/light[All Fields] OR adult/lim[All Fields] OR adult/limbic[All Fields] OR adult/limt[All  
28 Fields] OR adult/liver[All Fields] OR adult/living[All Fields] OR adult/local[All Fields] OR adult/low[All  
29 Fields] OR adult/luminal[All Fields] OR adult/lung[All Fields] OR adult/m[All Fields] OR  
30 adult/mainstream[All Fields] OR adult/male[All Fields] OR adult/marriage[All Fields] OR  
31 adult/maternal[All Fields] OR adult/maternity/pediatric[All Fields] OR adult/mature[All Fields] OR  
32 adult/matured[All Fields] OR adult/mel[All Fields] OR adult/meningoen[All Fields] OR  
33 adult/mentor[All Fields] OR adult/mesenchymal[All Fields] OR adult/middle[All Fields] OR  
34 adult/migratory[All Fields] OR adult/milking[All Fields] OR adult/minor[All Fields] OR adult/mixed[All  
35 Fields] OR adult/mixed/paediatric[All Fields] OR adult/mo[All Fields] OR adult/month[All Fields] OR  
36 adult/mother[All Fields] OR adult/mouse[All Fields] OR adult/mouse/chromaffin[All Fields] OR  
37 adult/mouse/melanotroph[All Fields] OR adult/multiple[All Fields] OR adult/n5[All Fields] OR  
38 adult/neonatal[All Fields] OR adult/neonate[All Fields] OR adult/nestling[All Fields] OR  
39 adult/neural[All Fields] OR adult/new[All Fields] OR adult/newborn[All Fields] OR  
40 adult/newborn/mouse[All Fields] OR adult/no[All Fields] OR adult/non[All Fields] OR  
41 adult/nonadult[All Fields] OR adult/nondiabetic[All Fields] OR adult/normal[All Fields] OR  
42 adult/not[All Fields] OR adult/nursing[All Fields] OR adult/nymph[All Fields] OR adult/nymphal[All  
43 Fields] OR adult/nymphclas[All Fields] OR adult/nymphs[All Fields] OR adult/occupational[All Fields]  
44 OR adult/offspring[All Fields] OR adult/old[All Fields] OR adult/older[All Fields] OR adult/olfactory[All  
45 Fields] OR adult/olympic[All Fields] OR adult/one[All Fields] OR adult/only[All Fields] OR adult/or[All  
46 Fields] OR adult/other[All Fields] OR adult/overall[All Fields] OR adult/p30[All Fields] OR  
47 adult/p40[All Fields] OR adult/paediatric[All Fields] OR adult/paediatric3[All Fields] OR  
48 adult/paired[All Fields] OR adult/palliative[All Fields] OR adult/pancrea[All Fields] OR  
49 adult/panicle[All Fields] OR adult/parent[All Fields] OR adult/parent/carer[All Fields] OR  
50 adult/parent's[All Fields] OR adult/parental[All Fields] OR adult/parents[All Fields] OR

1  
2  
3 adult/partnerill[All Fields] OR adult/patient[All Fields] OR adult/peak[All Fields] OR adult/ped[All  
4 Fields] OR adult/ped/neo[All Fields] OR adult/pediatric[All Fields] OR adult/pediatric/both[All Fields]  
5 OR adult/pediatric/mixed[All Fields] OR adult/peds[All Fields] OR adult/peer[All Fields] OR  
6 adult/people[All Fields] OR adult/perinatal[All Fields] OR adult/peripubertal[All Fields] OR  
7 adult/permanent[All Fields] OR adult/person[All Fields] OR adult/pharate[All Fields] OR  
8 adult/physiologic[All Fields] OR adult/pig[All Fields] OR adult/pig/chromaffin[All Fields] OR  
9 adult/pituitary[All Fields] OR adult/post[All Fields] OR adult/postductal/juxtaductal[All Fields] OR  
10 adult/postnatal[All Fields] OR adult/pregnancy[All Fields] OR adult/premorbid[All Fields] OR  
11 adult/preterm[All Fields] OR adult/prime[All Fields] OR adult/professional[All Fields] OR  
12 adult/progenitor[All Fields] OR adult/prx[All Fields] OR adult/psychology[All Fields] OR adult/pup[All  
13 Fields] OR adult/pupae[All Fields] OR adult/pupal[All Fields] OR adult/pupil[All Fields] OR  
14 adult/puppy[All Fields] OR adult/quiescent[All Fields] OR adult/radio/television[All Fields] OR  
15 adult/ramet[All Fields] OR adult/ramets[All Fields] OR adult/rat[All Fields] OR  
16 adult/rat/chromaffin[All Fields] OR adult/rat/melanotroph[All Fields] OR adult/reference[All Fields]  
17 OR adult/relative[All Fields] OR adult/renal[All Fields] OR adult/reproductive[All Fields] OR  
18 adult/researcher[All Fields] OR adult/retired[All Fields] OR adult/retrospective[All Fields] OR  
19 adult/rhesus[All Fields] OR adult/rugose[All Fields] OR adult/s[All Fields] OR adult/saline[All Fields]  
20 OR adult/school[All Fields] OR adult/selected[All Fields] OR adult/self[All Fields] OR  
21 adult/senescence[All Fields] OR adult/senescent[All Fields] OR adult/senile[All Fields] OR  
22 adult/senior[All Fields] OR adult/seniorsex[All Fields] OR adult/sexually[All Fields] OR  
23 adult/shelter/home[All Fields] OR adult/ship[All Fields] OR adult/somatic[All Fields] OR  
24 adult/sows[All Fields] OR adult/spawning[All Fields] OR adult/special[All Fields] OR adult/spinal[All  
25 Fields] OR adult/standard[All Fields] OR adult/stem[All Fields] OR adult/stomach[All Fields] OR  
26 adult/student[All Fields] OR adult/sub[All Fields] OR adult/subadult[All Fields] OR adult/subadults[All  
27 Fields] OR adult/substitute[All Fields] OR adult/supervisor[All Fields] OR adult/support[All Fields] OR  
28 adult/surface[All Fields] OR adult/t315[All Fields] OR adult/t315i[All Fields] OR adult/tbi[All Fields]  
29 OR adult/td[All Fields] OR adult/teacher[All Fields] OR adult/teen[All Fields] OR adult/teenage[All  
30 Fields] OR adult/teens[All Fields] OR adult/terminally[All Fields] OR adult/testes[All Fields] OR  
31 adult/testis[All Fields] OR adult/the[All Fields] OR adult/therapy[All Fields] OR adult/thymus[All  
32 Fields] OR adult/tissue[All Fields] OR adult/tissue/somatic[All Fields] OR adult/to[All Fields] OR  
33 adult/toddler[All Fields] OR adult/tongue[All Fields] OR adult/total[All Fields] OR adult/trained[All  
34 Fields] OR adult/transitional[All Fields] OR adult/trap[All Fields] OR adult/trap/day[All Fields] OR  
35 adult/traumatic[All Fields] OR adult/treatment[All Fields] OR adult/tritonymph[All Fields] OR  
36 adult/tube[All Fields] OR adult/tx[All Fields] OR adult/tya/paediatric[All Fields] OR adult/u[All Fields]  
37 OR adult/unclear[All Fields] OR adult/unknown[All Fields] OR adult/untrained[All Fields] OR  
38 adult/viability[All Fields] OR adult/viabilitya[All Fields] OR adult/voluntary[All Fields] OR  
39 adult/weanling[All Fields] OR adult/week/trap[All Fields] OR adult/weighing[All Fields] OR  
40 adult/well[All Fields] OR adult/white[All Fields] OR adult/wildtype[All Fields] OR adult/women[All  
41 Fields] OR adult/women's[All Fields] OR adult/worker[All Fields] OR adult/workers[All Fields] OR  
42 adult/wt[All Fields] OR adult/x[All Fields] OR adult/xiphoid[All Fields] OR adult/ya[All Fields] OR  
43 adult/year[All Fields] OR adult/yearaverage[All Fields] OR adult/yearling[All Fields] OR  
44 adult/young[All Fields] OR adult/younger[All Fields] OR adult/youth[All Fields] OR adult/youths[All  
45 Fields] OR adult/zebrafish[All Fields] OR adult'[All Fields] OR adult'/de[All Fields] OR adult'/exp[All  
46 Fields] OR adult''[All Fields] OR adult'2[All Fields] OR adult'3[All Fields] OR adult'4[All Fields] OR  
47 adult'5[All Fields] OR adult'5'[All Fields] OR adult'7[All Fields] OR adult'9[All Fields] OR  
48 adult'activity[All Fields] OR adult'acute[All Fields] OR adult'brain[All Fields] OR adult'heads[All Fields]  
49 OR adult'male[All Fields] OR adult'phase[All Fields] OR adult's[All Fields] OR adult's'[All Fields] OR  
50 adult'thymocytes[All Fields] OR adult'type[All Fields] OR adult,/globin[All Fields] OR adult0[All Fields]

1  
2  
3 OR adult02[All Fields] OR adult04[All Fields] OR adult0a[All Fields] OR adult1[All Fields] OR  
4 adult1,2[All Fields] OR adult1,2,8,9[All Fields] OR adult10[All Fields] OR adult104[All Fields] OR  
5 adult104,105[All Fields] OR adult107[All Fields] OR adult11[All Fields] OR adult118[All Fields] OR  
6 adult12[All Fields] OR adult120[All Fields] OR adult13[All Fields] OR adult14[All Fields] OR  
7 adult14'[All Fields] OR adult14'5[All Fields] OR adult15[All Fields] OR adult15,16[All Fields] OR  
8 adult16[All Fields] OR adult17[All Fields] OR adult18[All Fields] OR adult1817[All Fields] OR  
9 adult19[All Fields] OR adult1l[All Fields] OR adult2[All Fields] OR adult2,3[All Fields] OR adult20[All  
10 Fields] OR adult20,27,28[All Fields] OR adult2010[All Fields] OR adult21[All Fields] OR adult22[All  
11 Fields] OR adult23[All Fields] OR adult24[All Fields] OR adult2413[All Fields] OR adult2442[All Fields]  
12 OR adult25[All Fields] OR adult25,44,45[All Fields] OR adult26[All Fields] OR adult27[All Fields] OR  
13 adult28[All Fields] OR adult295[All Fields] OR adult2tscore[All Fields] OR adult3[All Fields] OR  
14 adult3'[All Fields] OR adult3,4[All Fields] OR adult30[All Fields] OR adult3029[All Fields] OR  
15 adult31[All Fields] OR adult32[All Fields] OR adult3222[All Fields] OR adult33'55[All Fields] OR  
16 adult3332[All Fields] OR adult37[All Fields] OR adult38[All Fields] OR adult39[All Fields] OR  
17 adult3929[All Fields] OR adult3days[All Fields] OR adult4[All Fields] OR adult4'[All Fields] OR  
18 adult4'13[All Fields] OR adult4083[All Fields] OR adult40benner[All Fields] OR adult42[All Fields] OR  
19 adult44[All Fields] OR adult4443[All Fields] OR adult4502[All Fields] OR adult46[All Fields] OR  
20 adult47[All Fields] OR adult4s[All Fields] OR adult5[All Fields] OR adult5'[All Fields] OR adult50[All  
21 Fields] OR adult53[All Fields] OR adult54[All Fields] OR adult55'56[All Fields] OR adult56[All Fields]  
22 OR adult59[All Fields] OR adult5and[All Fields] OR adult6[All Fields] OR adult6'[All Fields] OR  
23 adult63b[All Fields] OR adult6hr[All Fields] OR adult6rurh[All Fields] OR adult7[All Fields] OR  
24 adult7'[All Fields] OR adult7,22,23[All Fields] OR adult70'71[All Fields] OR adult73[All Fields] OR  
25 adult75[All Fields] OR adult76[All Fields] OR adult77[All Fields] OR adult8[All Fields] OR adult80[All  
26 Fields] OR adult8a[All Fields] OR adult9[All Fields] OR adult9,23[All Fields] OR adult91[All Fields] OR  
27 adult93[All Fields] OR adult94[All Fields] OR adult97[All Fields] OR adult`s[All Fields] OR adulta[All  
28 Fields] OR adulta'[All Fields] OR adulta'memory[All Fields] OR adultaalike[All Fields] OR  
29 adultabdomen[All Fields] OR adultabundance[All Fields] OR adultac[All Fields] OR  
30 adultacanthocheilonema[All Fields] OR adultacheck[All Fields] OR adultactivetij[All Fields] OR  
31 adultactivities[All Fields] OR adultactivitiesandtheevolution[All Fields] OR adultactivity[All Fields] OR  
32 adultactualreper[All Fields] OR adultacute[All Fields] OR adultadd[All Fields] OR adultaddictive[All  
33 Fields] OR adultadhdsummary[All Fields] OR adultadolescent[All Fields] OR  
34 adultadolescentadultadolescent[All Fields] OR adultadolescentadultadolescentadultadolescent[All  
35 Fields] OR adultadolescentchild[All Fields]) AND ("chronic disease"[All Fields] OR "chronic illness"[All  
36 Fields] OR "chronic condition"[All Fields] OR "long term disease"[All Fields] OR "long term illness"[All  
37 Fields] OR "long term condition"[All Fields]) AND ("medication compliance"[All Fields] OR  
38 "medication adherence"[All Fields] OR "medication concordance"[All Fields] OR "medication  
39 persistence"[All Fields]) AND ("2002/01/01"[PDat] : "2018/05/31"[PDat])  
40  
41  
42  
43  
44  
45  
46  
47  
48  
49  
50  
51  
52  
53  
54  
55  
56  
57  
58  
59  
60

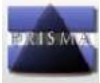

# PRISMA 2009 Checklist

1  
2  
3  
4  
5  
6  
7  
8  
9  
10  
11  
12  
13  
14  
15  
16  
17  
18  
19  
20  
21  
22  
23  
24  
25  
26  
27  
28  
29  
30  
31  
32  
33  
34  
35  
36  
37  
38  
39  
40  
41  
42  
43  
44  
45  
46  
47

| Section/topic                      | #  | Checklist item                                                                                                                                                                                                                                                                                              | Reported on page # |
|------------------------------------|----|-------------------------------------------------------------------------------------------------------------------------------------------------------------------------------------------------------------------------------------------------------------------------------------------------------------|--------------------|
| <b>TITLE</b>                       |    |                                                                                                                                                                                                                                                                                                             |                    |
| Title                              | 1  | Identify the report as a systematic review, meta-analysis, or both.                                                                                                                                                                                                                                         | 1                  |
| <b>ABSTRACT</b>                    |    |                                                                                                                                                                                                                                                                                                             |                    |
| Structured summary                 | 2  | Provide a structured summary including, as applicable: background; objectives; data sources; study eligibility criteria, participants, and interventions; study appraisal and synthesis methods; results; limitations; conclusions and implications of key findings; systematic review registration number. | 2                  |
| <b>INTRODUCTION</b>                |    |                                                                                                                                                                                                                                                                                                             |                    |
| Rationale                          | 3  | Describe the rationale for the review in the context of what is already known.                                                                                                                                                                                                                              | 3                  |
| Objectives                         | 4  | Provide an explicit statement of questions being addressed with reference to participants, interventions, comparisons, outcomes, and study design (PICOS).                                                                                                                                                  | 3-4                |
| <b>METHODS</b>                     |    |                                                                                                                                                                                                                                                                                                             |                    |
| Protocol and registration          | 5  | Indicate if a review protocol exists, if and where it can be accessed (e.g., Web address), and, if available, provide registration information including registration number.                                                                                                                               | 4                  |
| Eligibility criteria               | 6  | Specify study characteristics (e.g., PICOS, length of follow-up) and report characteristics (e.g., years considered, language, publication status) used as criteria for eligibility, giving rationale.                                                                                                      | 4                  |
| Information sources                | 7  | Describe all information sources (e.g., databases with dates of coverage, contact with study authors to identify additional studies) in the search and date last searched.                                                                                                                                  | 5                  |
| Search                             | 8  | Present full electronic search strategy for at least one database, including any limits used, such that it could be repeated.                                                                                                                                                                               | 5                  |
| Study selection                    | 9  | State the process for selecting studies (i.e., screening, eligibility, included in systematic review, and, if applicable, included in the meta-analysis).                                                                                                                                                   | 5                  |
| Data collection process            | 10 | Describe method of data extraction from reports (e.g., piloted forms, independently, in duplicate) and any processes for obtaining and confirming data from investigators.                                                                                                                                  | 5                  |
| Data items                         | 11 | List and define all variables for which data were sought (e.g., PICOS, funding sources) and any assumptions and simplifications made.                                                                                                                                                                       | 4                  |
| Risk of bias in individual studies | 12 | Describe methods used for assessing risk of bias of individual studies (including specification of whether this was done at the study or outcome level), and how this information is to be used in any data synthesis.                                                                                      | 5                  |
| Summary measures                   | 13 | State the principal summary measures (e.g., risk ratio, difference in means).                                                                                                                                                                                                                               | 4                  |
| Synthesis of results               | 14 | Describe the methods of handling data and combining results of studies, if done, including measures of consistency (e.g., I <sup>2</sup> ) for each meta-analysis.                                                                                                                                          | 13                 |



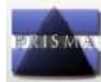

# PRISMA 2009 Checklist

Page 1 of 2

| Section/topic                 | #  | Checklist item                                                                                                                                                                                           | Reported on page # |
|-------------------------------|----|----------------------------------------------------------------------------------------------------------------------------------------------------------------------------------------------------------|--------------------|
| Risk of bias across studies   | 15 | Specify any assessment of risk of bias that may affect the cumulative evidence (e.g., publication bias, selective reporting within studies).                                                             | 5                  |
| Additional analyses           | 16 | Describe methods of additional analyses (e.g., sensitivity or subgroup analyses, meta-regression), if done, indicating which were pre-specified.                                                         | n/a                |
| <b>RESULTS</b>                |    |                                                                                                                                                                                                          |                    |
| Study selection               | 17 | Give numbers of studies screened, assessed for eligibility, and included in the review, with reasons for exclusions at each stage, ideally with a flow diagram.                                          | 6                  |
| Study characteristics         | 18 | For each study, present characteristics for which data were extracted (e.g., study size, PICOS, follow-up period) and provide the citations.                                                             | 7-10               |
| Risk of bias within studies   | 19 | Present data on risk of bias of each study and, if available, any outcome level assessment (see item 12).                                                                                                | 13                 |
| Results of individual studies | 20 | For all outcomes considered (benefits or harms), present, for each study: (a) simple summary data for each intervention group (b) effect estimates and confidence intervals, ideally with a forest plot. | 7-10               |
| Synthesis of results          | 21 | Present results of each meta-analysis done, including confidence intervals and measures of consistency.                                                                                                  | n/a                |
| Risk of bias across studies   | 22 | Present results of any assessment of risk of bias across studies (see Item 15).                                                                                                                          | 13                 |
| Additional analysis           | 23 | Give results of additional analyses, if done (e.g., sensitivity or subgroup analyses, meta-regression [see Item 16]).                                                                                    | n/a                |
| <b>DISCUSSION</b>             |    |                                                                                                                                                                                                          |                    |
| Summary of evidence           | 24 | Summarize the main findings including the strength of evidence for each main outcome; consider their relevance to key groups (e.g., healthcare providers, users, and policy makers).                     | 14                 |
| Limitations                   | 25 | Discuss limitations at study and outcome level (e.g., risk of bias), and at review-level (e.g., incomplete retrieval of identified research, reporting bias).                                            | 14-15              |
| Conclusions                   | 26 | Provide a general interpretation of the results in the context of other evidence, and implications for future research.                                                                                  | 14                 |
| <b>FUNDING</b>                |    |                                                                                                                                                                                                          |                    |
| Funding                       | 27 | Describe sources of funding for the systematic review and other support (e.g., supply of data); role of funders for the systematic review.                                                               | 15                 |

From: Moher D, Liberati A, Tetzlaff J, Altman DG, The PRISMA Group (2009). Preferred Reporting Items for Systematic Reviews and Meta-Analyses: The PRISMA Statement. PLoS Med 6(7): e1000097. doi:10.1371/journal.pmed1000097

For more information, visit: [www.prisma-statement.org](http://www.prisma-statement.org).

Page 2 of 2

For peer review only - <http://bmjopen.bmj.com/site/about/guidelines.xhtml>
