# Supplementary material for: What are the important design features of personal health records to improve medication adherence for patients with long-term conditions? A systematic literature review
Source: PubMed Central journal article supplement — BMJ Open. 2019 Sep 26;9(9):e028628. doi: 10.1136/bmjopen-2018-028628 (PMC6773318; doi:10.1136/bmjopen-2018-028628), 2019-09-26
Supplement: bmjopen-2018-028628supp001.pdf [file bmjopen-2018-028628supp001.pdf]

| Study             | Study Type                          | Starting Point | Risk of Bias    | Inconsistency | Indirectness | Imprecision  | Publication bias | Quality of evidence |
|-------------------|-------------------------------------|----------------|-----------------|---------------|--------------|--------------|------------------|---------------------|
| Allam 2015        | RCT                                 | high           | Unclear (-1)    | Unclear (-1)  | Unlikely     | Unclear (-1) | Unlikely         | Low                 |
| Chrischilles 2014 | RCT                                 | high           | Unclear (-1)    | Unlikely      | Unclear (-1) | High (-2)    | Unlikely         | Low                 |
| Dalgaard 2013     | Case series                         | low            | High (-2)       | Unlikely      | Unlikely     | High (-2)    | Unlikely         | Very Low            |
| Fioravanti 2015   | RCT                                 | high           | Unclear (-1)    | Unlikely      | Unlikely     | Unclear (-1) | Unclear (-1)     | Moderate            |
| Foreman 2012      | cohort study                        | moderate       | Unclear (-1)    | Unlikely      | Unlikely     | Unclear (-1) | Unlikely         | Low                 |
| Glaser 2017       | RCT                                 | high           | No risk of bias | Unlikely      | Unlikely     | Unlikely     | Unlikely         | High                |
| Glasgow 2012      | RCT                                 | high           | Unclear (-1)    | Unclear (-1)  | Unlikely     | Unclear (-1) | Unlikely         | Low                 |
| Hou 2012          | cohort study                        | moderate       | Unclear (-1)    | High (-2)     | Unlikely     | Unlikely     | Unlikely         | Low                 |
| Kaplan 2013       | systematic literature review        | high           | Unclear (-1)    | Unclear (-1)  | Unlikely     | Unclear (-1) | High (-2)        | Low                 |
| Keith 2013        | cross sectional study               | low            | Unclear (-1)    | Unlikely      | Unlikely     | Unlikely     | Unlikely         | Low                 |
| Lee 2014          | RCT                                 | high           | High (-2)       | High (-2)     | Unlikely     | Unlikely     | Unlikely         | Low                 |
| Luque 2012        | RCT                                 | high           | Unclear (-1)    | Unlikely      | Unlikely     | Unlikely     | Unclear (-1)     | Moderate            |
| McDermott 2013    | systematic literature review        | high           | Unclear (-1)    | Unlikely      | Unclear (-1) | Unlikely     | Unlikely         | Moderate            |
| McGillicuddy 2013 | RCT                                 | high           | Unclear (-1)    | Unlikely      | Unclear (-1) | Unclear (-1) | Unclear (-1)     | Low                 |
| McLean 2016       | systematic literature review with m | high           | Unclear (-1)    | Unlikely      | Unlikely     | Unlikely     | Unlikely         | High                |
| Mistry 2015       | systematic literature review        | high           | Unclear (-1)    | Unlikely      | Unlikely     | Unlikely     | Unlikely         | High                |
| Morton 2017       | systematic literature review        | high           | Unclear (-1)    | Unlikely      | Unlikely     | Unclear (-1) | Unlikely         | Moderate            |
| Naslund 2017      | narrative literature review         | high           | High (-2)       | Unlikely      | Unlikely     | Unclear (-1) | Unclear (-1)     | Low                 |
| Park 2014         | systematic literature review        | high           | Unclear (-1)    | Unlikely      | Unlikely     | Unlikely     | Unclear          | High                |
| Patel 2013        | RCT                                 | high           | Unclear (-1)    | Unlikely      | Unlikely     | High (-2)    | Unclear (-1)     | Low                 |
| Riva 2014         | RCT                                 | high           | Unclear (-1)    | Unlikely      | Unlikely     | Unclear (-1) | Unlikely         | Moderate            |
| Siu 2017          | quasi-experimental                  | moderate       | Unclear (-1)    | Unlikely      | Unlikely     | Unclear (-1) | Unlikely         | Low                 |
| Stephani 2016     | systematic literature review        | high           | Unclear (-1)    | Unlikely      | Unlikely     | Unclear (-1) | Unclear          | Moderate            |
| Tang 2013         | RCT                                 | high           | High (-2)       | Unlikely      | Unlikely     | Unlikely     | Unlikely         | Moderate            |
| Westergaard 2017  | Qualitative study                   | moderate       | Unclear (-1)    | Unlikely      | Unclear (-1) | Unlikely     | Unlikely         | Low                 |
| Yu 2014           | cohort study                        | moderate       | Unclear (-1)    | High (-2)     | Unlikely     | Unlikely     | Unlikely         | Low                 |
| Zettl 2016        | cohort study                        | moderate       | Unclear (-1)    | Unlikely      | Unlikely     | Unclear (-1) | Unlikely         | Low                 |

|                      | Random sequence generation (selection bias) | Allocation concealment (selection bias) | Blinding of participants and personnel (performance bias) | Blinding of outcome assessment (detection bias) | Incomplete outcome data (attrition bias) | Selective reporting (reporting bias) | Other bias |
|----------------------|---------------------------------------------|-----------------------------------------|-----------------------------------------------------------|-------------------------------------------------|------------------------------------------|--------------------------------------|------------|
| Allam 2015           | +                                           | +                                       | ?                                                         | ?                                               | -                                        | +                                    | -          |
| Chrischilles 2014    | +                                           | +                                       | ?                                                         | ?                                               | +                                        | +                                    | -          |
| Dabbs 2016           | +                                           | +                                       | ?                                                         | +                                               | +                                        | +                                    | +          |
| Dorr 2007            | +                                           | ?                                       | ?                                                         | ?                                               | ?                                        | -                                    | -          |
| Fioravanti 2015      | ?                                           | ?                                       | ?                                                         | ?                                               | +                                        | +                                    | -          |
| Glaser 2017          | +                                           | +                                       | +                                                         | +                                               | +                                        | +                                    | +          |
| Glasgow 2012         | ?                                           | ?                                       | ?                                                         | ?                                               | +                                        | +                                    | +          |
| Grant 2008           | -                                           | ?                                       | ?                                                         | ?                                               | +                                        | +                                    | +          |
| Harrison 2014        | +                                           | ?                                       | ?                                                         | ?                                               | ?                                        | -                                    | -          |
| Lakshminarayana 2017 | +                                           | +                                       | -                                                         | +                                               | -                                        | +                                    | -          |
| Luque 2012           | ?                                           | ?                                       | ?                                                         | ?                                               | -                                        | +                                    | -          |
| McDermott 2013       | +                                           | ?                                       | ?                                                         | ?                                               | ?                                        | ?                                    | +          |
| McLean 2016          | +                                           | ?                                       | ?                                                         | ?                                               | +                                        | +                                    | +          |
| Mira 2014            | ?                                           | ?                                       | -                                                         | +                                               | +                                        | +                                    | ?          |
| Mistry 2015          | +                                           | ?                                       | ?                                                         | ?                                               | +                                        | ?                                    | +          |
| Morton 2017          | +                                           | -                                       | ?                                                         | ?                                               | -                                        | +                                    | +          |
| Park 2014            | ?                                           | ?                                       | ?                                                         | ?                                               | -                                        | ?                                    | +          |
| Perera 2014          | ?                                           | ?                                       | ?                                                         | ?                                               | +                                        | +                                    | -          |
| Riva 2014            | +                                           | -                                       | +                                                         | ?                                               | +                                        | +                                    | -          |
| Stephani 2016        | +                                           | ?                                       | ?                                                         | ?                                               | -                                        | ?                                    | +          |
| Tang 2013            | +                                           | +                                       | -                                                         | +                                               | +                                        | +                                    | +          |
| Westergaard 2017     | ?                                           | ?                                       | -                                                         | ?                                               | ?                                        | +                                    | -          |
| Zettl 2016           | -                                           | -                                       | ?                                                         | ?                                               | ?                                        | ?                                    | -          |
