# Supplementary material for: What are the important design features of personal health records to improve medication adherence for patients with long-term conditions? A systematic literature review
Source: PubMed Central journal article supplement — BMJ Open. 2019 Sep 26;9(9):e028628. doi: 10.1136/bmjopen-2018-028628 (PMC6773318; doi:10.1136/bmjopen-2018-028628), 2019-09-26
Supplement: bmjopen-2018-028628supp002.pdf [file bmjopen-2018-028628supp002.pdf]

## Search strategy for PubMed central

("phr"[All Fields] OR "personal health record"[All Fields] OR "patient portal"[All Fields]) AND (adult[All Fields] OR adult/10[All Fields] OR adult/100[All Fields] OR adult/11[All Fields] OR adult/111[All Fields] OR adult/15[All Fields] OR adult/18[All Fields] OR adult/18,19,49/see[All Fields] OR adult/18yrs[All Fields] OR adult/2[All Fields] OR adult/20[All Fields] OR adult/21[All Fields] OR adult/26[All Fields] OR adult/285[All Fields] OR adult/2cm2[All Fields] OR adult/3[All Fields] OR adult/32[All Fields] OR adult/36[All Fields] OR adult/3647446[All Fields] OR adult/3[All Fields] OR adult/4,7,11/should[All Fields] OR adult/40[All Fields] OR adult/400[All Fields] OR adult/44[All Fields] OR adult/5[All Fields] OR adult/50[All Fields] OR adult/56[All Fields] OR adult/6[All Fields] OR adult/60[All Fields] OR adult/7[All Fields] OR adult/70[All Fields] OR adult/74[All Fields] OR adult/8[All Fields] OR adult/9[All Fields] OR adult/97[All Fields] OR adult/97egfp[All Fields] OR adult/a[All Fields] OR adult/acquired[All Fields] OR adult/activational[All Fields] OR adult/acute[All Fields] OR adult/ad[All Fields] OR adult/ad3[All Fields] OR adult/adenovirus[All Fields] OR adult/adolescent[All Fields] OR adult/adolescent/school[All Fields] OR adult/adolescents[All Fields] OR adult/adult[All Fields] OR adult/adult/senior[All Fields] OR adult/adult/senior/mixed[All Fields] OR adult/adult's[All Fields] OR adult/aged[All Fields] OR adult/ageing[All Fields] OR adult/aging[All Fields] OR adult/allogenic[All Fields] OR adult/always[All Fields] OR adult/and[All Fields] OR adult/animal[All Fields] OR adult/anoxia[All Fields] OR adult/apex[All Fields] OR adult/arrhythmic[All Fields] OR adult/assets[All Fields] OR adult/attending[All Fields] OR adult/authority[All Fields] OR adult/base[All Fields] OR adult/bcg/dtp/ipv/opv/mmr/dt/td[All Fields] OR adult/benign[All Fields] OR adult/bioline[All Fields] OR adult/bovine[All Fields] OR adult/bovine/chromaffin[All Fields] OR adult/breeding[All Fields] OR adult/bregma[All Fields] OR adult/c[All Fields] OR adult/cancer[All Fields] OR adult/canine[All Fields] OR adult/caregiver[All Fields] OR adult/carer[All Fields] OR adult/carer/parent[All Fields] OR adult/cat[All Fields] OR adult/cat/chromaffin[All Fields] OR adult/caterpillar[All Fields] OR adult/caucasian[All Fields] OR adult/caucasian/male[All Fields] OR adult/cd[All Fields] OR adult/cell[All Fields] OR adult/cercarial[All Fields] OR adult/chick[All Fields] OR adult/chick/egg[All Fields] OR adult/child[All Fields] OR adult/child/both[All Fields] OR adult/child/infant[All Fields] OR adult/child/neonate[All Fields] OR adult/child/senior[All Fields] OR adult/childhood[All Fields] OR adult/childhoodsepb[All Fields] OR adult/children[All Fields] OR adult/choose[All Fields] OR adult/chronic[All Fields] OR adult/classic[All Fields] OR adult/classical[All Fields] OR adult/clutch[All Fields] OR adult/cm[All Fields] OR adult/coach[All Fields] OR adult/college[All Fields] OR adult/commercial[All Fields] OR adult/community[All Fields] OR adult/contact[All Fields] OR adult/contemporary[All Fields] OR adult/control[All Fields] OR adult/cord[All Fields] OR adult/cordadult[All Fields] OR adult/cordretic[All Fields] OR adult/criminal[All Fields] OR adult/criminality[All Fields] OR adult/culture[All Fields] OR adult/cysticerci[All Fields] OR adult/dark[All Fields] OR adult/dauer[All Fields] OR adult/day[All Fields] OR adult/ddlt[All Fields] OR adult/de[All Fields] OR adult/deaf[All Fields] OR adult/deaf/hh[All Fields] OR adult/definitive[All Fields] OR adult/deformity[All Fields] OR adult/dementia[All Fields] OR adult/developed[All Fields] OR adult/developmental[All Fields] OR adult/diabetic[All Fields] OR adult/differentiated[All Fields] OR adult/disc[All Fields] OR adult/diseased[All Fields] OR adult/disposable[All Fields] OR adult/domicile[All Fields] OR adult/dual[All Fields] OR adult/dyspraxia[All Fields] OR adult/e17[All Fields] OR adult/early[All Fields] OR adult/educators[All Fields] OR adult/ee[All Fields] OR adult/egg[All Fields] OR adult/eggs/larvae/pupae[All Fields] OR adult/elder[All Fields] OR adult/elderly[All Fields] OR adult/elite[All Fields] OR adult/embryo[All Fields] OR adult/embryonic[All Fields] OR adult/emergence[All Fields] OR adult/emerging[All Fields] OR adult/erythroid[All Fields] OR adult/established[All Fields] OR adult/etiology[All Fields] OR

adult/etiology/immunology[All Fields] OR adult/exp[All Fields] OR adult/experimenter[All Fields] OR adult/f[All Fields] OR adult/f1[All Fields] OR adult/family[All Fields] OR adult/father[All Fields] OR adult/father's[All Fields] OR adult/feline[All Fields] OR adult/female[All Fields] OR adult/fertile[All Fields] OR adult/fetal[All Fields] OR adult/fetus[All Fields] OR adult/ffq[All Fields] OR adult/final[All Fields] OR adult/first[All Fields] OR adult/fluent[All Fields] OR adult/foetal[All Fields] OR adult/friend[All Fields] OR adult/further[All Fields] OR adult/g[All Fields] OR adult/general[All Fields] OR adult/geriatric[All Fields] OR adult/gero[All Fields] OR adult/gerontologic[All Fields] OR adult/gerontological[All Fields] OR adult/gerontology[All Fields] OR adult/giobin[All Fields] OR adult/gp[All Fields] OR adult/group[All Fields] OR adult/guardian[All Fields] OR adult/ha[All Fields] OR adult/healthy[All Fields] OR adult/helper[All Fields] OR adult/heteronereis[All Fields] OR adult/hfd[All Fields] OR adult/high[All Fields] OR adult/higher[All Fields] OR adult/hiv[All Fields] OR adult/household[All Fields] OR adult/human[All Fields] OR adult/human/chromaffin[All Fields] OR adult/human/person[All Fields] OR adult/iis[All Fields] OR adult/immature[All Fields] OR adult/immature/gall[All Fields] OR adult/immediate[All Fields] OR adult/in[All Fields] OR adult/individual[All Fields] OR adult/infant[All Fields] OR adult/infantile[All Fields] OR adult/infected[All Fields] OR adult/informal[All Fields] OR adult/institutional[All Fields] OR adult/intact[All Fields] OR adult/internal[All Fields] OR adult/investigator[All Fields] OR adult/ischemia[All Fields] OR adult/junctional[All Fields] OR adult/junior[All Fields] OR adult/juv[All Fields] OR adult/juvenile[All Fields] OR adult/juvenile/family[All Fields] OR adult/juvenile/pups[All Fields] OR adult/juvenile/unknown[All Fields] OR adult/juveniles[All Fields] OR adult/kc[All Fields] OR adult/kitten[All Fields] OR adult/known[All Fields] OR adult/l[All Fields] OR adult/l3[All Fields] OR adult/l4[All Fields] OR adult/large[All Fields] OR adult/larger[All Fields] OR adult/larva[All Fields] OR adult/larvae[All Fields] OR adult/larval[All Fields] OR adult/last[All Fields] OR adult/late[All Fields] OR adult/later[All Fields] OR adult/ldt[All Fields] OR adult/lifelong[All Fields] OR adult/lifetime[All Fields] OR adult/light[All Fields] OR adult/lim[All Fields] OR adult/limbic[All Fields] OR adult/limt[All Fields] OR adult/liver[All Fields] OR adult/living[All Fields] OR adult/local[All Fields] OR adult/low[All Fields] OR adult/luminal[All Fields] OR adult/lung[All Fields] OR adult/m[All Fields] OR adult/mainstream[All Fields] OR adult/male[All Fields] OR adult/marriage[All Fields] OR adult/maternal[All Fields] OR adult/maternity/pediatric[All Fields] OR adult/mature[All Fields] OR adult/matured[All Fields] OR adult/mel[All Fields] OR adult/meningoen[All Fields] OR adult/mentor[All Fields] OR adult/mesenchymal[All Fields] OR adult/middle[All Fields] OR adult/migratory[All Fields] OR adult/milking[All Fields] OR adult/minor[All Fields] OR adult/mixed[All Fields] OR adult/mixed/paediatric[All Fields] OR adult/mo[All Fields] OR adult/month[All Fields] OR adult/mother[All Fields] OR adult/mouse[All Fields] OR adult/mouse/chromaffin[All Fields] OR adult/mouse/melanotroph[All Fields] OR adult/multiple[All Fields] OR adult/n5[All Fields] OR adult/neonatal[All Fields] OR adult/neonate[All Fields] OR adult/nestling[All Fields] OR adult/neural[All Fields] OR adult/new[All Fields] OR adult/newborn[All Fields] OR adult/newborn/mouse[All Fields] OR adult/no[All Fields] OR adult/non[All Fields] OR adult/nonadult[All Fields] OR adult/nondiabetic[All Fields] OR adult/normal[All Fields] OR adult/not[All Fields] OR adult/nursing[All Fields] OR adult/nymph[All Fields] OR adult/nymphal[All Fields] OR adult/nymphclas[All Fields] OR adult/nymphs[All Fields] OR adult/occupational[All Fields] OR adult/offspring[All Fields] OR adult/old[All Fields] OR adult/older[All Fields] OR adult/olfactory[All Fields] OR adult/olympic[All Fields] OR adult/one[All Fields] OR adult/only[All Fields] OR adult/or[All Fields] OR adult/other[All Fields] OR adult/overall[All Fields] OR adult/p30[All Fields] OR adult/p40[All Fields] OR adult/paediatric[All Fields] OR adult/paediatric3[All Fields] OR adult/paired[All Fields] OR adult/palliative[All Fields] OR adult/pancrea[All Fields] OR adult/panicle[All Fields] OR adult/parent[All Fields] OR adult/parent/carer[All Fields] OR adult/parent's[All Fields] OR adult/parental[All Fields] OR adult/parents[All Fields] OR

adult/partnerill[All Fields] OR adult/patient[All Fields] OR adult/peak[All Fields] OR adult/ped[All Fields] OR adult/ped/neo[All Fields] OR adult/pediatric[All Fields] OR adult/pediatric/both[All Fields] OR adult/pediatric/mixed[All Fields] OR adult/peds[All Fields] OR adult/peer[All Fields] OR adult/people[All Fields] OR adult/perinatal[All Fields] OR adult/peripubertal[All Fields] OR adult/permanent[All Fields] OR adult/person[All Fields] OR adult/pharate[All Fields] OR adult/physiologic[All Fields] OR adult/pig[All Fields] OR adult/pig/chromaffin[All Fields] OR adult/pituitary[All Fields] OR adult/post[All Fields] OR adult/postductal/juxtaductal[All Fields] OR adult/postnatal[All Fields] OR adult/pregnancy[All Fields] OR adult/premorbidity[All Fields] OR adult/preterm[All Fields] OR adult/prime[All Fields] OR adult/professional[All Fields] OR adult/progenitor[All Fields] OR adult/prx[All Fields] OR adult/psychology[All Fields] OR adult/pup[All Fields] OR adult/pupae[All Fields] OR adult/pupal[All Fields] OR adult/pupil[All Fields] OR adult/puppy[All Fields] OR adult/quiescent[All Fields] OR adult/radio/television[All Fields] OR adult/ramet[All Fields] OR adult/ramets[All Fields] OR adult/rat[All Fields] OR adult/rat/chromaffin[All Fields] OR adult/rat/melanotroph[All Fields] OR adult/reference[All Fields] OR adult/relative[All Fields] OR adult/renal[All Fields] OR adult/reproductive[All Fields] OR adult/researcher[All Fields] OR adult/retired[All Fields] OR adult/retrospective[All Fields] OR adult/rhesus[All Fields] OR adult/rugose[All Fields] OR adult/s[All Fields] OR adult/saline[All Fields] OR adult/school[All Fields] OR adult/selected[All Fields] OR adult/self[All Fields] OR adult/senescence[All Fields] OR adult/senescent[All Fields] OR adult/senile[All Fields] OR adult/senior[All Fields] OR adult/seniorsex[All Fields] OR adult/sexually[All Fields] OR adult/shelter/home[All Fields] OR adult/ship[All Fields] OR adult/somatic[All Fields] OR adult/sows[All Fields] OR adult/spawning[All Fields] OR adult/special[All Fields] OR adult/spinal[All Fields] OR adult/standard[All Fields] OR adult/stem[All Fields] OR adult/stomach[All Fields] OR adult/student[All Fields] OR adult/sub[All Fields] OR adult/subadult[All Fields] OR adult/subadults[All Fields] OR adult/substitute[All Fields] OR adult/supervisor[All Fields] OR adult/support[All Fields] OR adult/surface[All Fields] OR adult/t315[All Fields] OR adult/t315i[All Fields] OR adult/tbi[All Fields] OR adult/td[All Fields] OR adult/teacher[All Fields] OR adult/teen[All Fields] OR adult/teenage[All Fields] OR adult/teens[All Fields] OR adult/terminally[All Fields] OR adult/testes[All Fields] OR adult/testis[All Fields] OR adult/the[All Fields] OR adult/therapy[All Fields] OR adult/thymus[All Fields] OR adult/tissue[All Fields] OR adult/tissue/somatic[All Fields] OR adult/to[All Fields] OR adult/toddler[All Fields] OR adult/tongue[All Fields] OR adult/total[All Fields] OR adult/trained[All Fields] OR adult/transitional[All Fields] OR adult/trap[All Fields] OR adult/trap/day[All Fields] OR adult/traumatic[All Fields] OR adult/treatment[All Fields] OR adult/tritonymph[All Fields] OR adult/tube[All Fields] OR adult/tx[All Fields] OR adult/tya/paediatric[All Fields] OR adult/u[All Fields] OR adult/unclear[All Fields] OR adult/unknown[All Fields] OR adult/untrained[All Fields] OR adult/viability[All Fields] OR adult/viabilitya[All Fields] OR adult/voluntary[All Fields] OR adult/weanling[All Fields] OR adult/week/trap[All Fields] OR adult/weighing[All Fields] OR adult/well[All Fields] OR adult/white[All Fields] OR adult/wildtype[All Fields] OR adult/women[All Fields] OR adult/women's[All Fields] OR adult/worker[All Fields] OR adult/workers[All Fields] OR adult/wt[All Fields] OR adult/x[All Fields] OR adult/xiphoid[All Fields] OR adult/ya[All Fields] OR adult/year[All Fields] OR adult/yearaverage[All Fields] OR adult/yearling[All Fields] OR adult/young[All Fields] OR adult/younger[All Fields] OR adult/youth[All Fields] OR adult/youths[All Fields] OR adult/zebrafish[All Fields] OR adult'[All Fields] OR adult'/de[All Fields] OR adult'/exp[All Fields] OR adult''[All Fields] OR adult'2[All Fields] OR adult'3[All Fields] OR adult'4[All Fields] OR adult'5[All Fields] OR adult'5'[All Fields] OR adult'7[All Fields] OR adult'9[All Fields] OR adult'activity[All Fields] OR adult'acute[All Fields] OR adult'brain[All Fields] OR adult'heads[All Fields] OR adult'male[All Fields] OR adult'phase[All Fields] OR adult's[All Fields] OR adult's'[All Fields] OR adult'thymocytes[All Fields] OR adult'type[All Fields] OR adult,/globin[All Fields] OR adult0[All Fields]

OR adult02[All Fields] OR adult04[All Fields] OR adult0a[All Fields] OR adult1[All Fields] OR adult1,2[All Fields] OR adult1,2,8,9[All Fields] OR adult10[All Fields] OR adult104[All Fields] OR adult104,105[All Fields] OR adult107[All Fields] OR adult11[All Fields] OR adult118[All Fields] OR adult12[All Fields] OR adult120[All Fields] OR adult13[All Fields] OR adult14[All Fields] OR adult14'[All Fields] OR adult14'5[All Fields] OR adult15[All Fields] OR adult15,16[All Fields] OR adult16[All Fields] OR adult17[All Fields] OR adult18[All Fields] OR adult1817[All Fields] OR adult19[All Fields] OR adult1[All Fields] OR adult2[All Fields] OR adult2,3[All Fields] OR adult20[All Fields] OR adult20,27,28[All Fields] OR adult2010[All Fields] OR adult21[All Fields] OR adult22[All Fields] OR adult23[All Fields] OR adult24[All Fields] OR adult2413[All Fields] OR adult2442[All Fields] OR adult25[All Fields] OR adult25,44,45[All Fields] OR adult26[All Fields] OR adult27[All Fields] OR adult28[All Fields] OR adult295[All Fields] OR adult2tscore[All Fields] OR adult3[All Fields] OR adult3'[All Fields] OR adult3,4[All Fields] OR adult30[All Fields] OR adult3029[All Fields] OR adult31[All Fields] OR adult32[All Fields] OR adult3222[All Fields] OR adult33'55[All Fields] OR adult3332[All Fields] OR adult37[All Fields] OR adult38[All Fields] OR adult39[All Fields] OR adult3929[All Fields] OR adult3days[All Fields] OR adult4[All Fields] OR adult4'[All Fields] OR adult4'13[All Fields] OR adult4083[All Fields] OR adult40benner[All Fields] OR adult42[All Fields] OR adult44[All Fields] OR adult4443[All Fields] OR adult4502[All Fields] OR adult46[All Fields] OR adult47[All Fields] OR adult4s[All Fields] OR adult5[All Fields] OR adult5'[All Fields] OR adult50[All Fields] OR adult53[All Fields] OR adult54[All Fields] OR adult55'56[All Fields] OR adult56[All Fields] OR adult59[All Fields] OR adult5and[All Fields] OR adult6[All Fields] OR adult6'[All Fields] OR adult63b[All Fields] OR adult6hr[All Fields] OR adult6rurh[All Fields] OR adult7[All Fields] OR adult7'[All Fields] OR adult7,22,23[All Fields] OR adult70'71[All Fields] OR adult73[All Fields] OR adult75[All Fields] OR adult76[All Fields] OR adult77[All Fields] OR adult8[All Fields] OR adult80[All Fields] OR adult8a[All Fields] OR adult9[All Fields] OR adult9,23[All Fields] OR adult91[All Fields] OR adult93[All Fields] OR adult94[All Fields] OR adult97[All Fields] OR adult's[All Fields] OR adulta[All Fields] OR adulta'[All Fields] OR adulta'memory[All Fields] OR adultaalike[All Fields] OR adultabdomen[All Fields] OR adultabundance[All Fields] OR adultac[All Fields] OR adultacanthocheilonema[All Fields] OR adultacheck[All Fields] OR adultactivetij[All Fields] OR adultactivities[All Fields] OR adultactivitiesandtheevolution[All Fields] OR adultactivity[All Fields] OR adultactualreper[All Fields] OR adultacute[All Fields] OR adultadd[All Fields] OR adultaddictive[All Fields] OR adultadhdssummary[All Fields] OR adultadolescent[All Fields] OR adultadolescentadultadolescent[All Fields] OR adultadolescentadultadolescentadultadolescent[All Fields] OR adultadolescentchild[All Fields]) AND ("chronic disease"[All Fields] OR "chronic illness"[All Fields] OR "chronic condition"[All Fields] OR "long term disease"[All Fields] OR "long term illness"[All Fields] OR "long term condition"[All Fields]) AND ("medication compliance"[All Fields] OR "medication adherence"[All Fields] OR "medication concordance"[All Fields] OR "medication persistence"[All Fields]) AND ("2002/01/01"[PDat] : "2018/05/31"[PDat])
